# Supplementary material
Source: PubMed Central journal article supplement (PMC2671850)

# Total Synthesis of ( $\pm$ )-Agelastatin A, A Potent Inhibitor of Osteopontin (OPN)–Mediated Neoplastic Transformations

*David P. Dickson and Duncan J. Wardrop\**

Department of Chemistry, University of Illinois at Chicago,  
845 West Taylor Street, Chicago, IL 60607.

## ***Supporting Information, Part 2***

\*Corresponding author:  
Tel: 312-996-8542  
Fax: 312-996-0431  
E-mail: wardropd@uic.edu

10

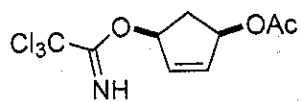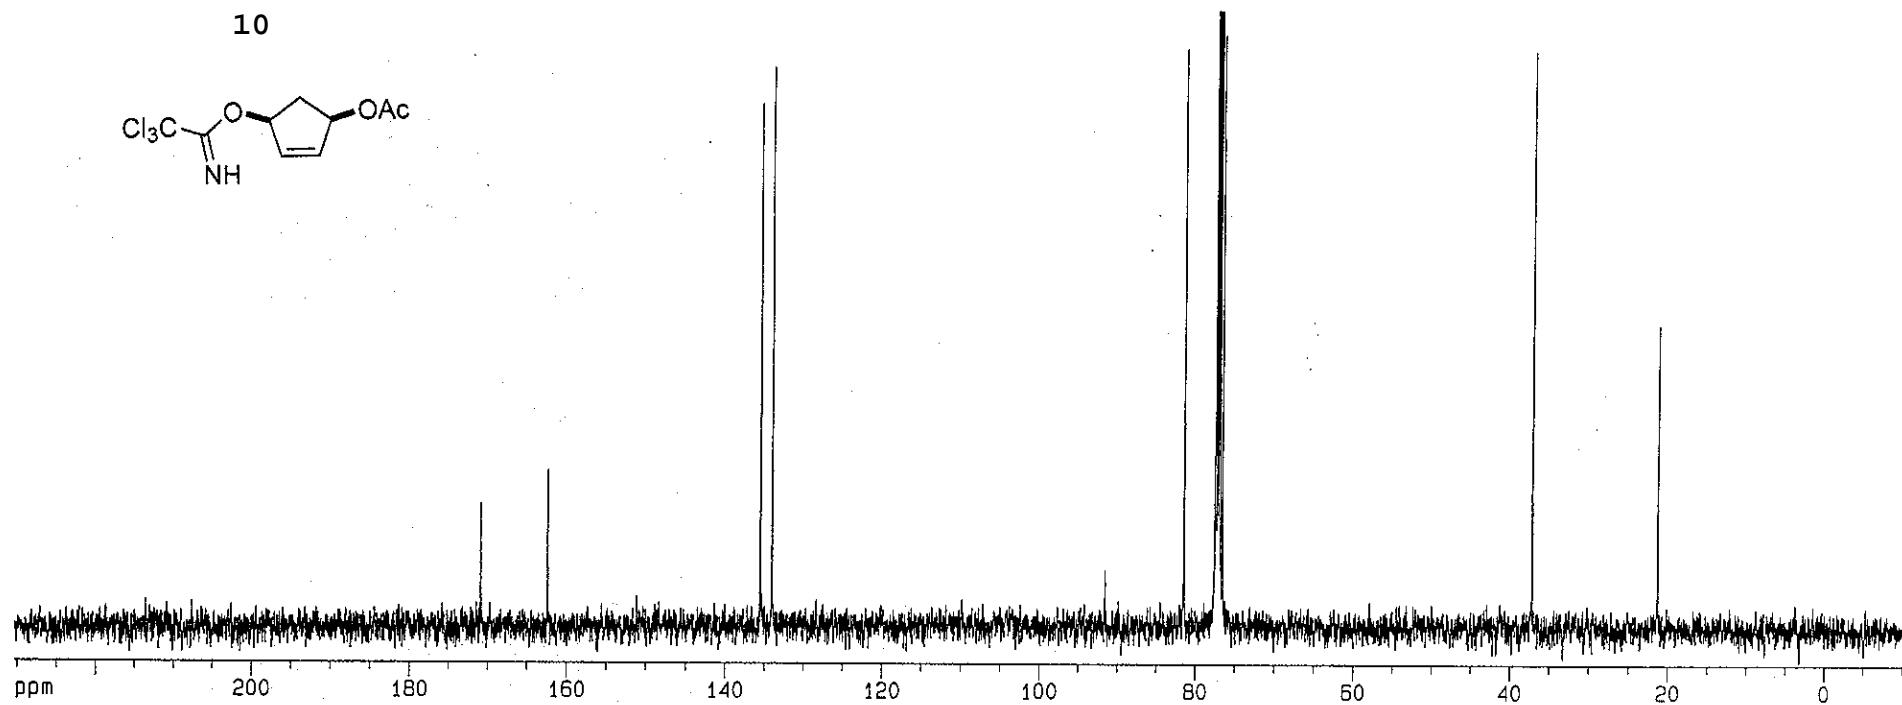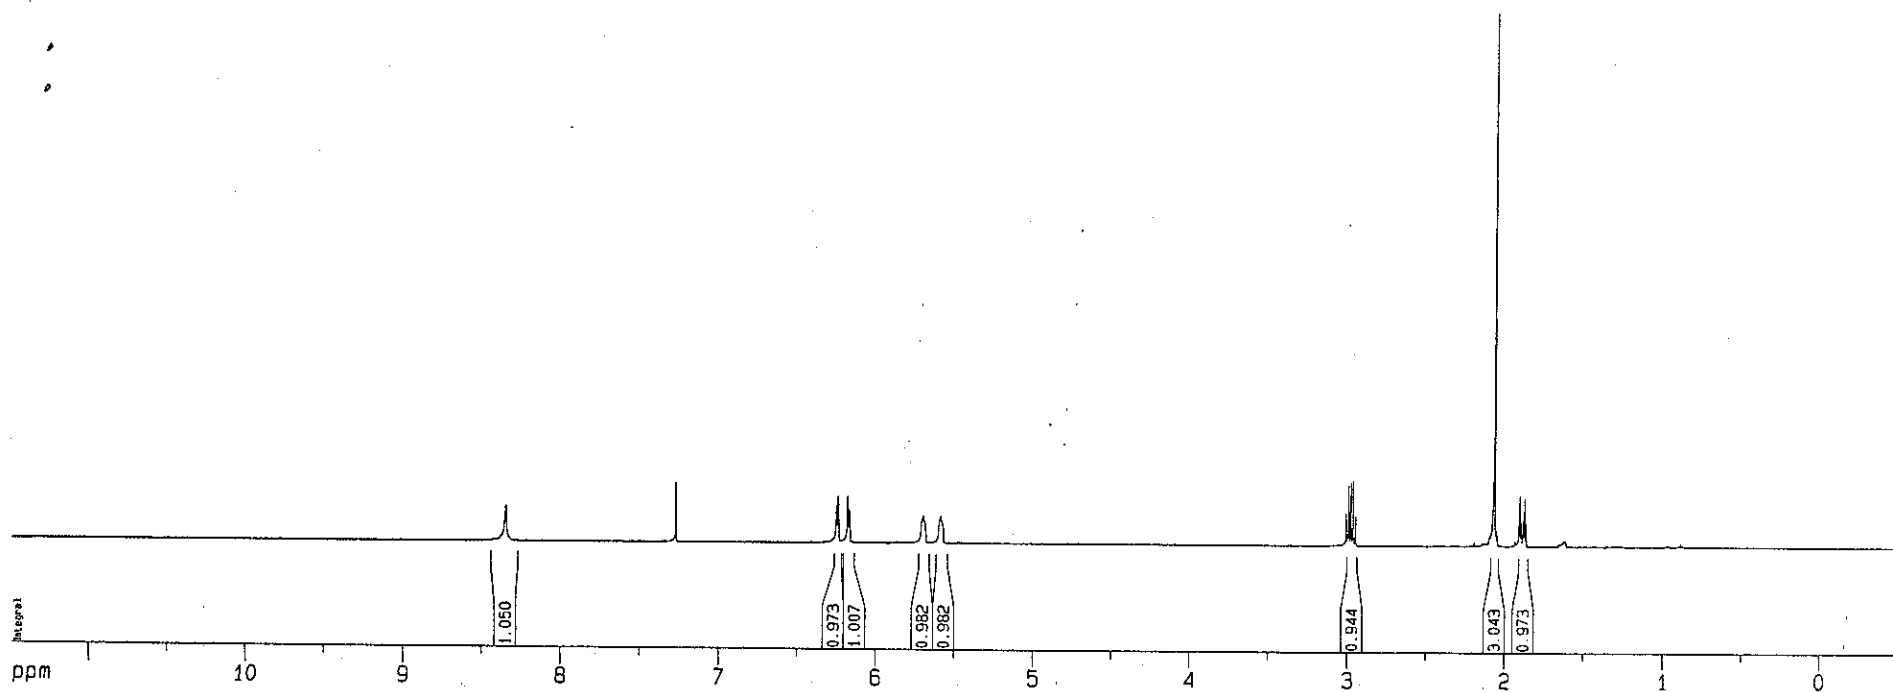

8

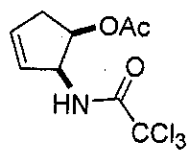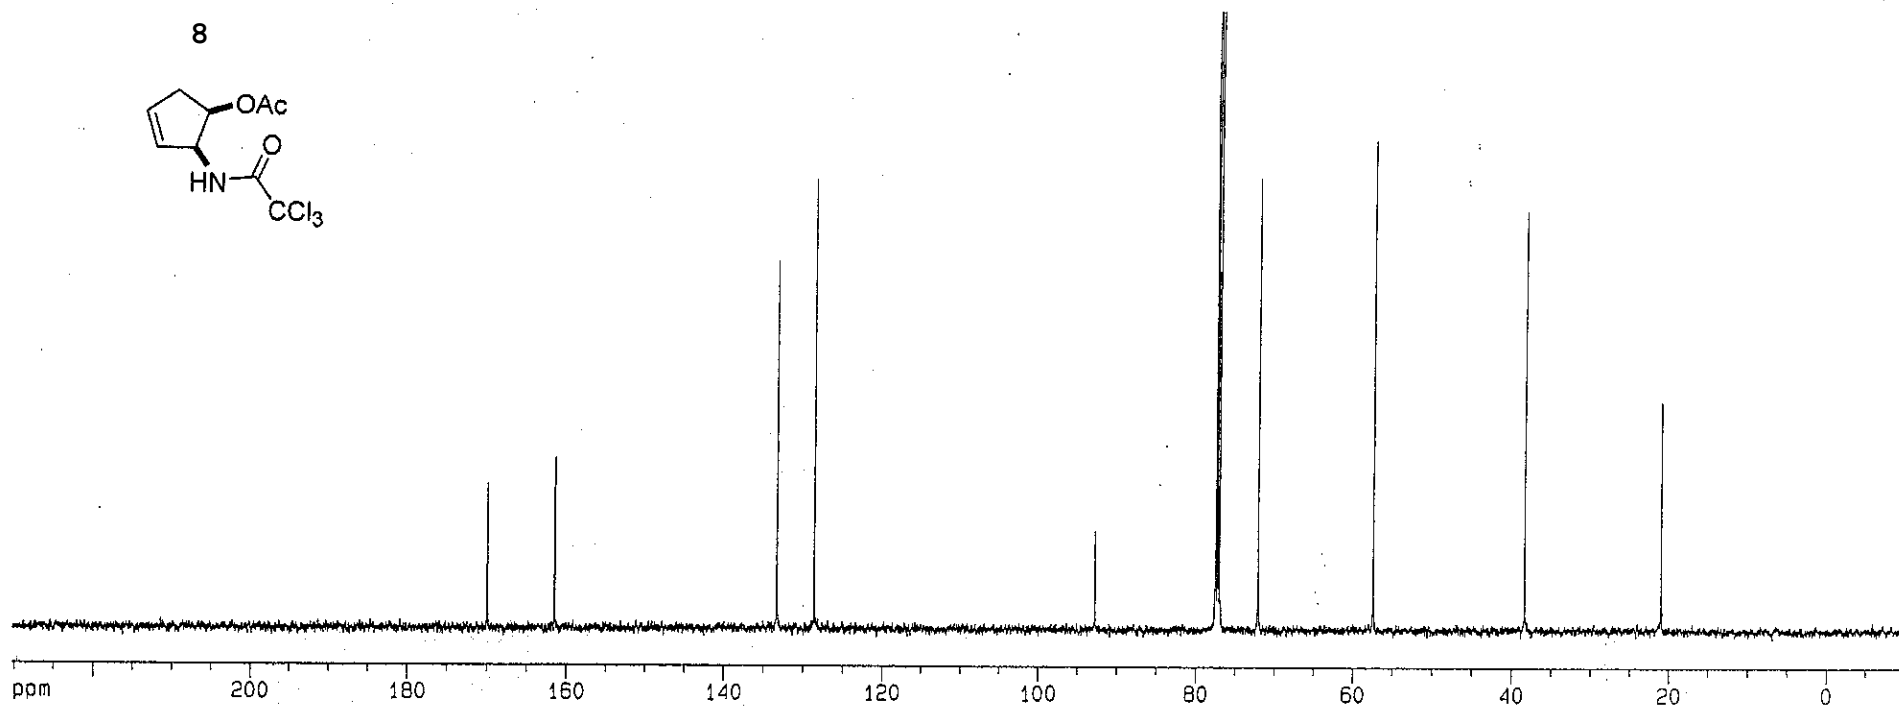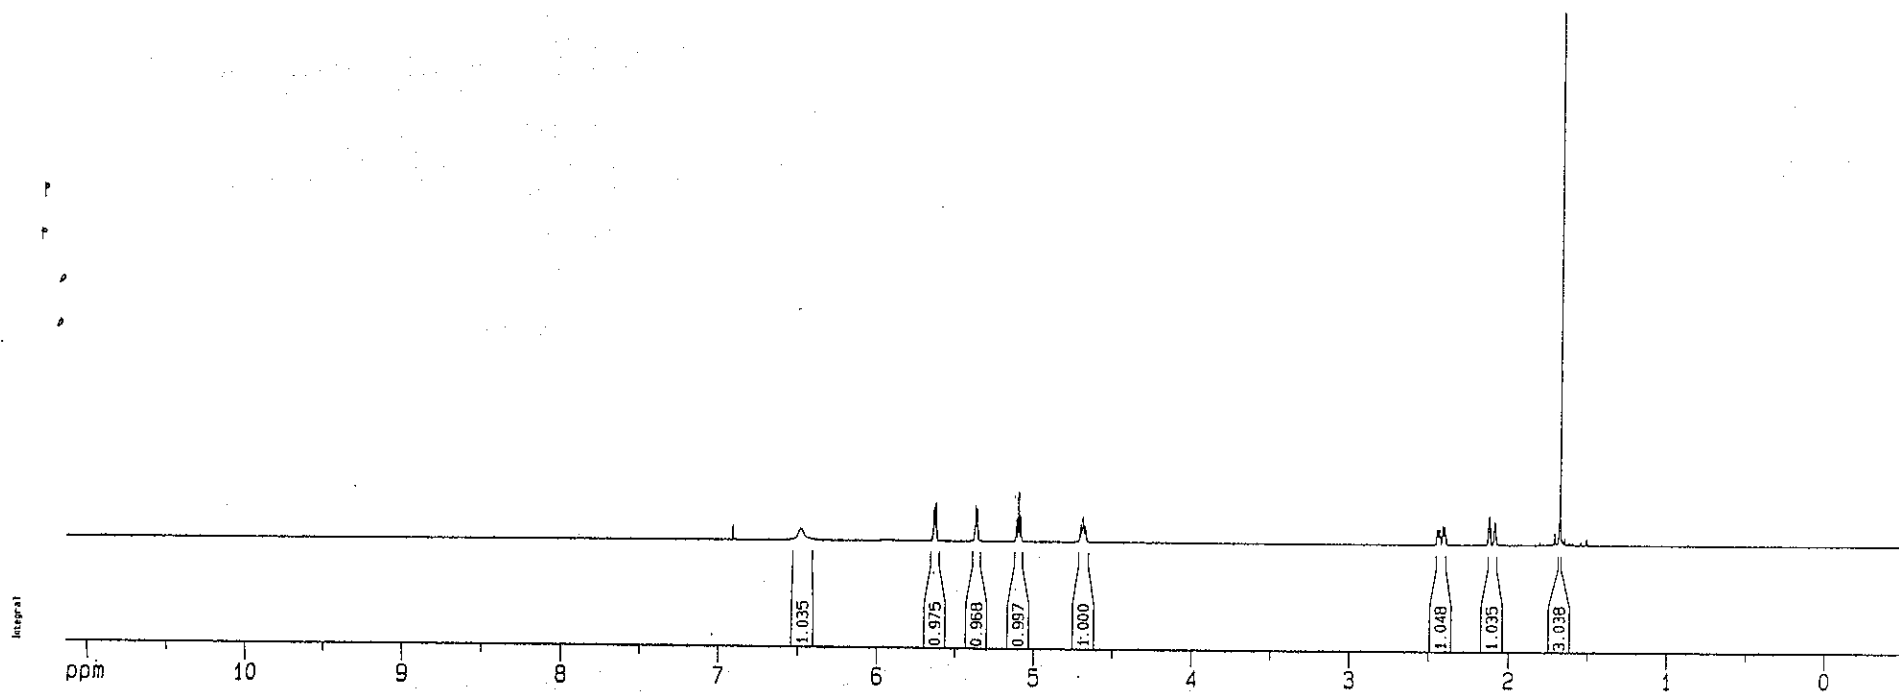

11

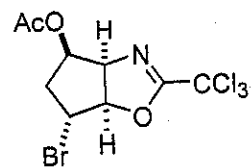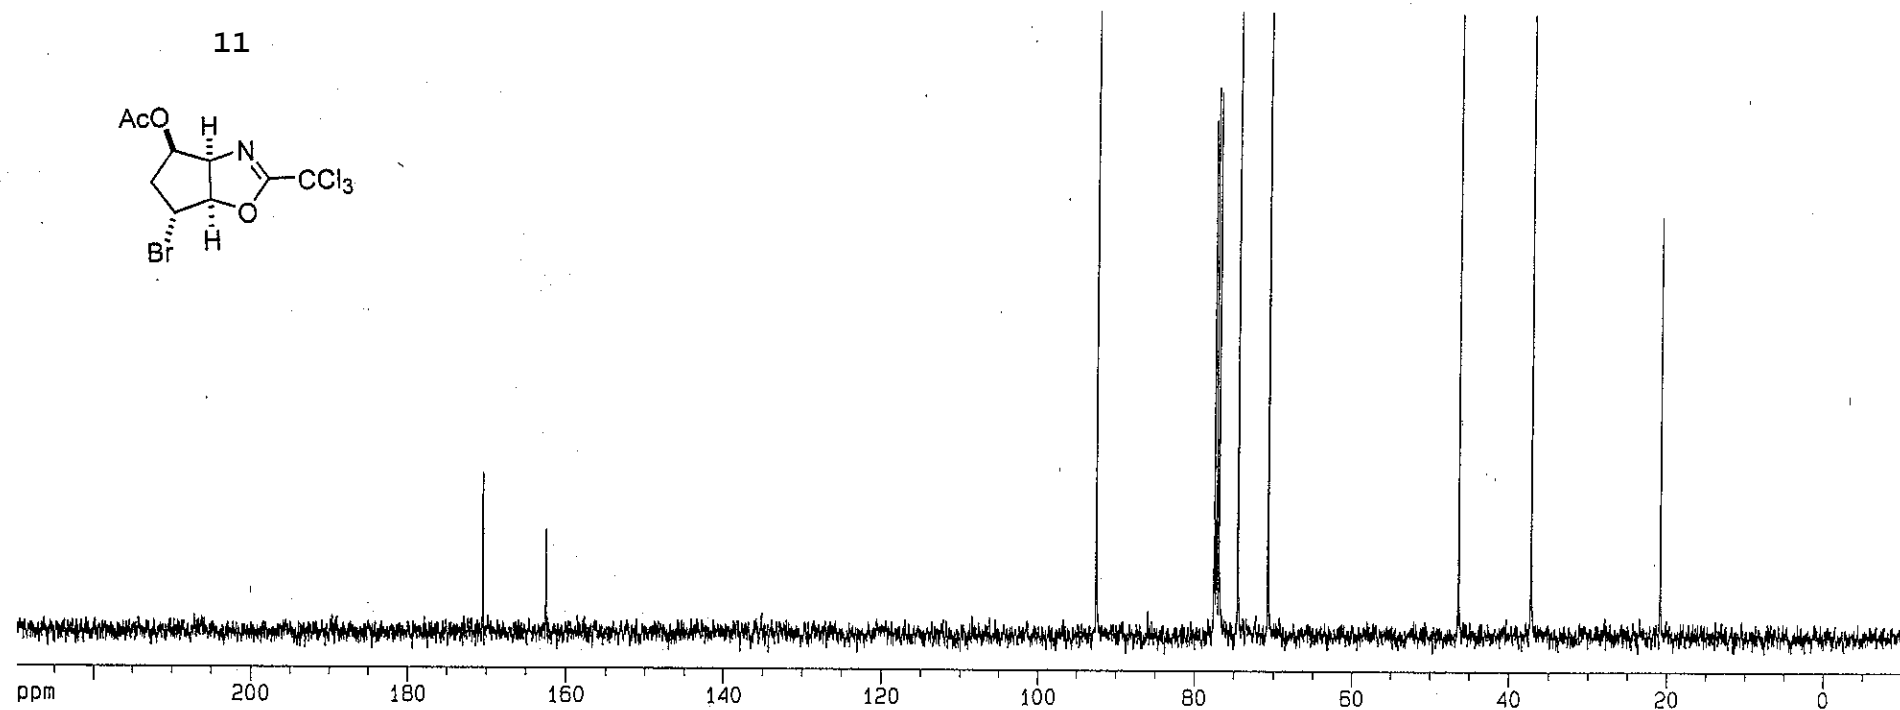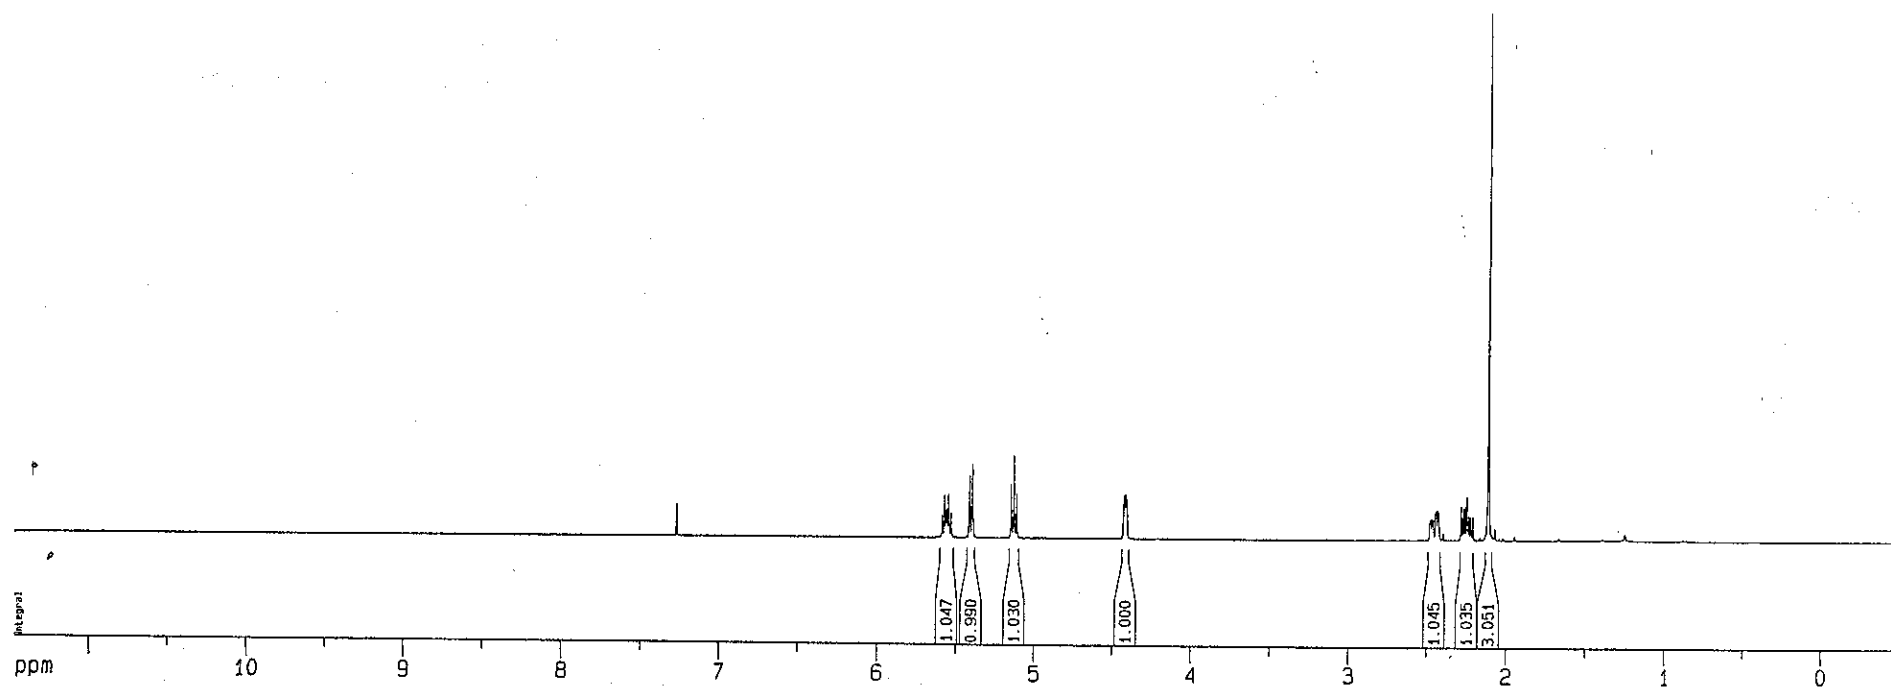

12

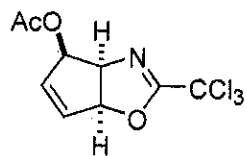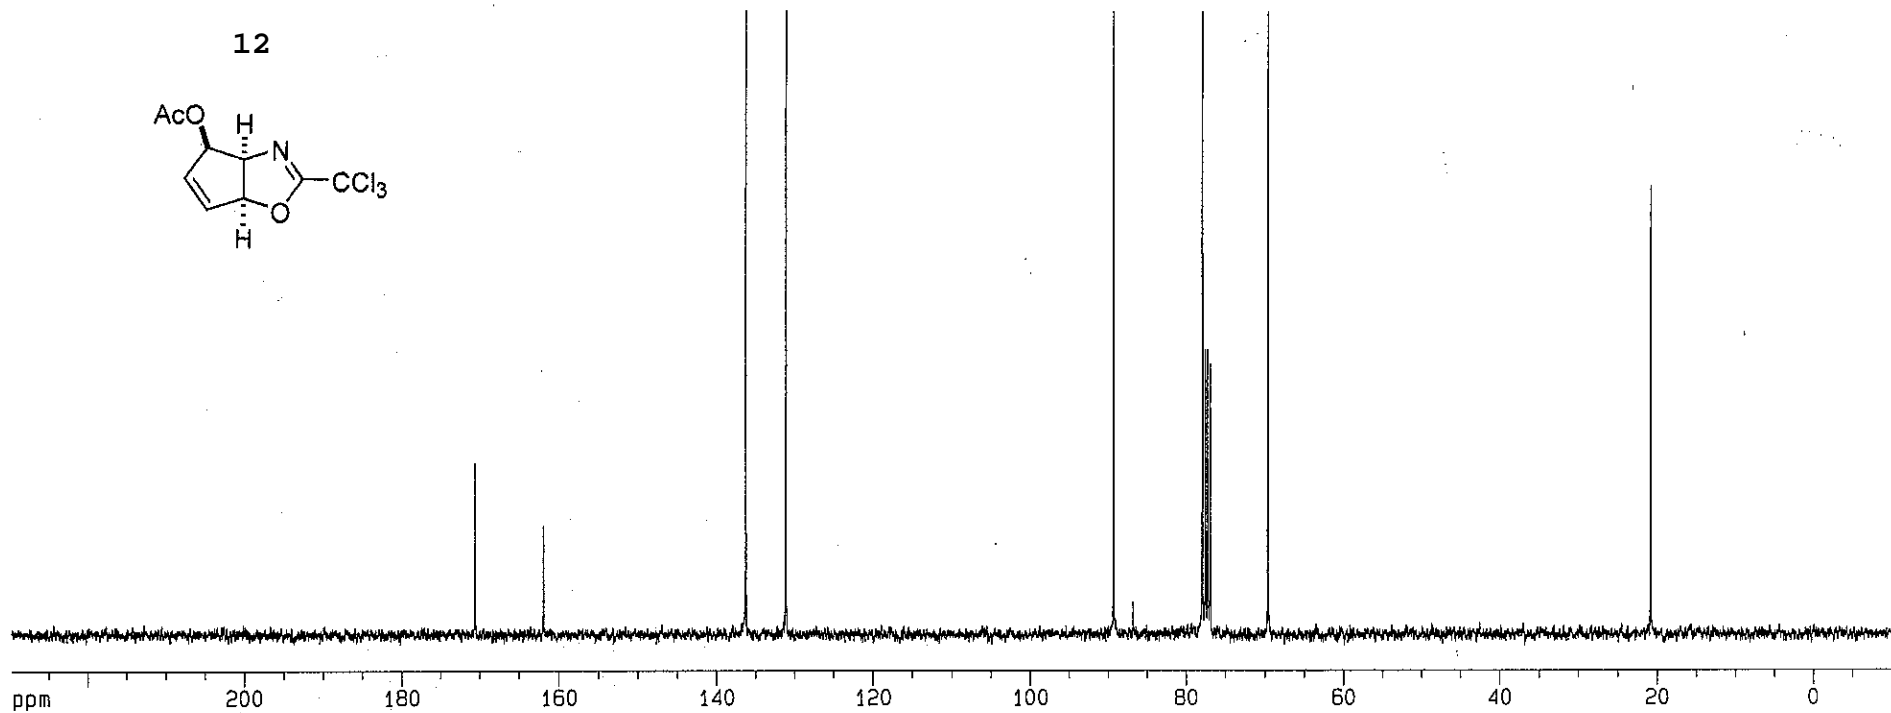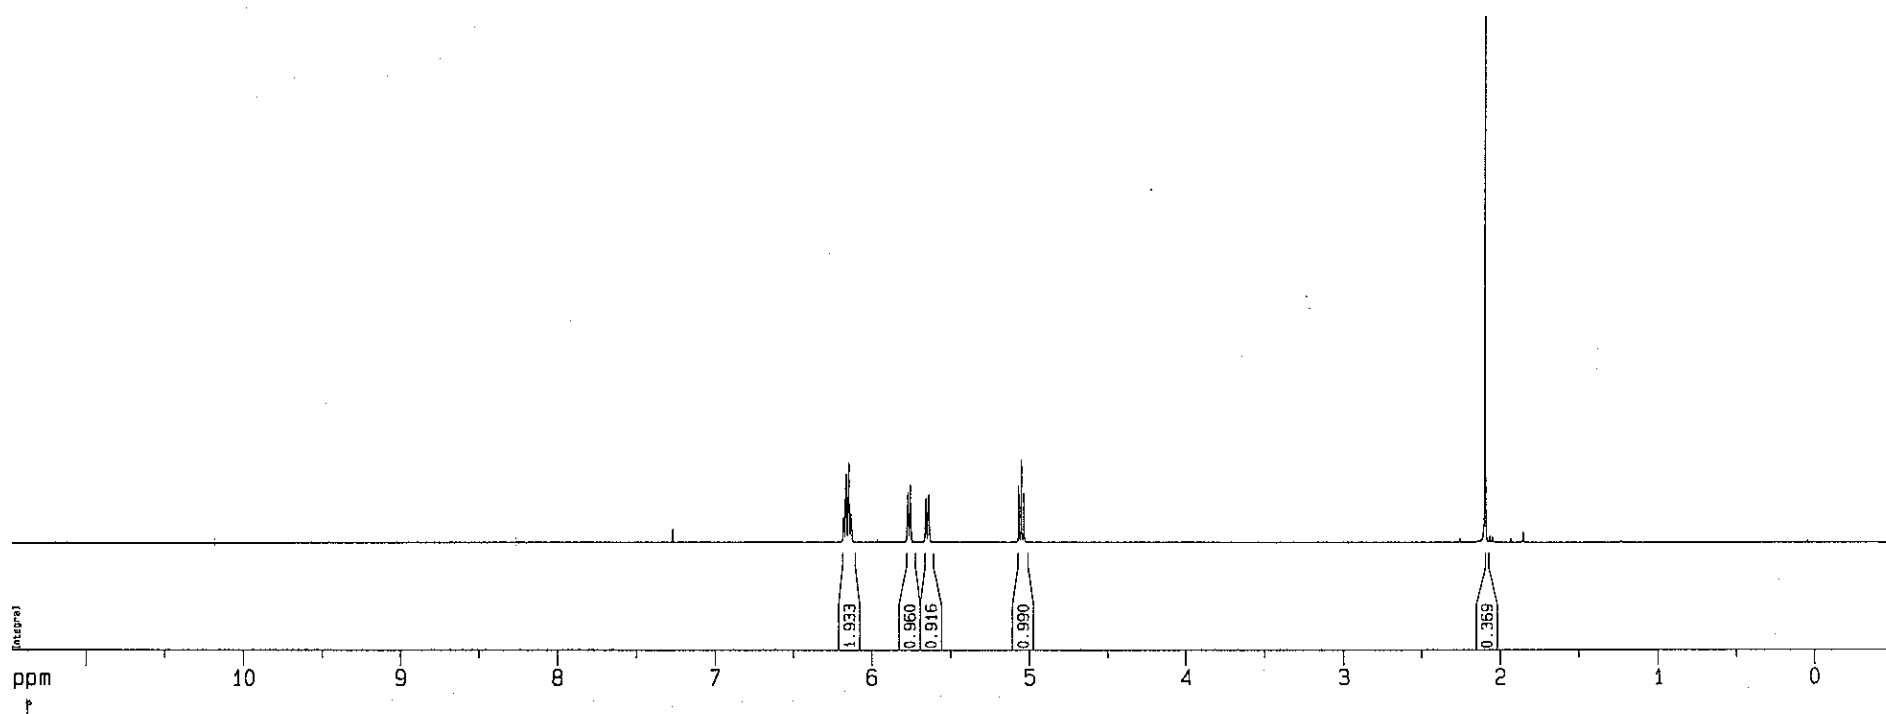

7

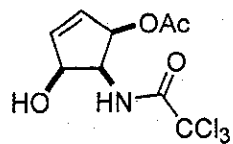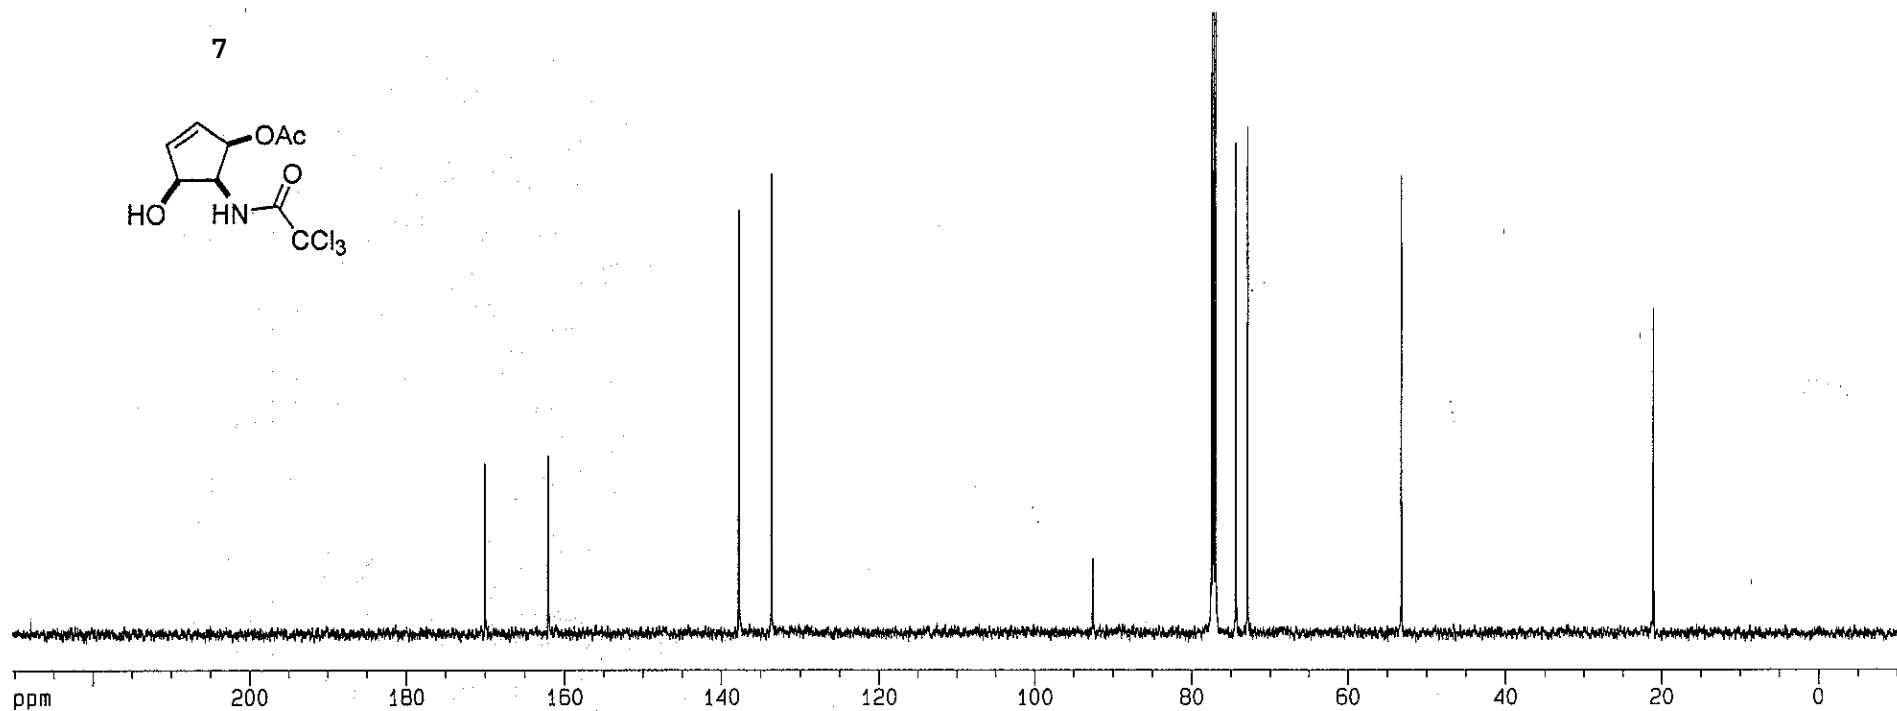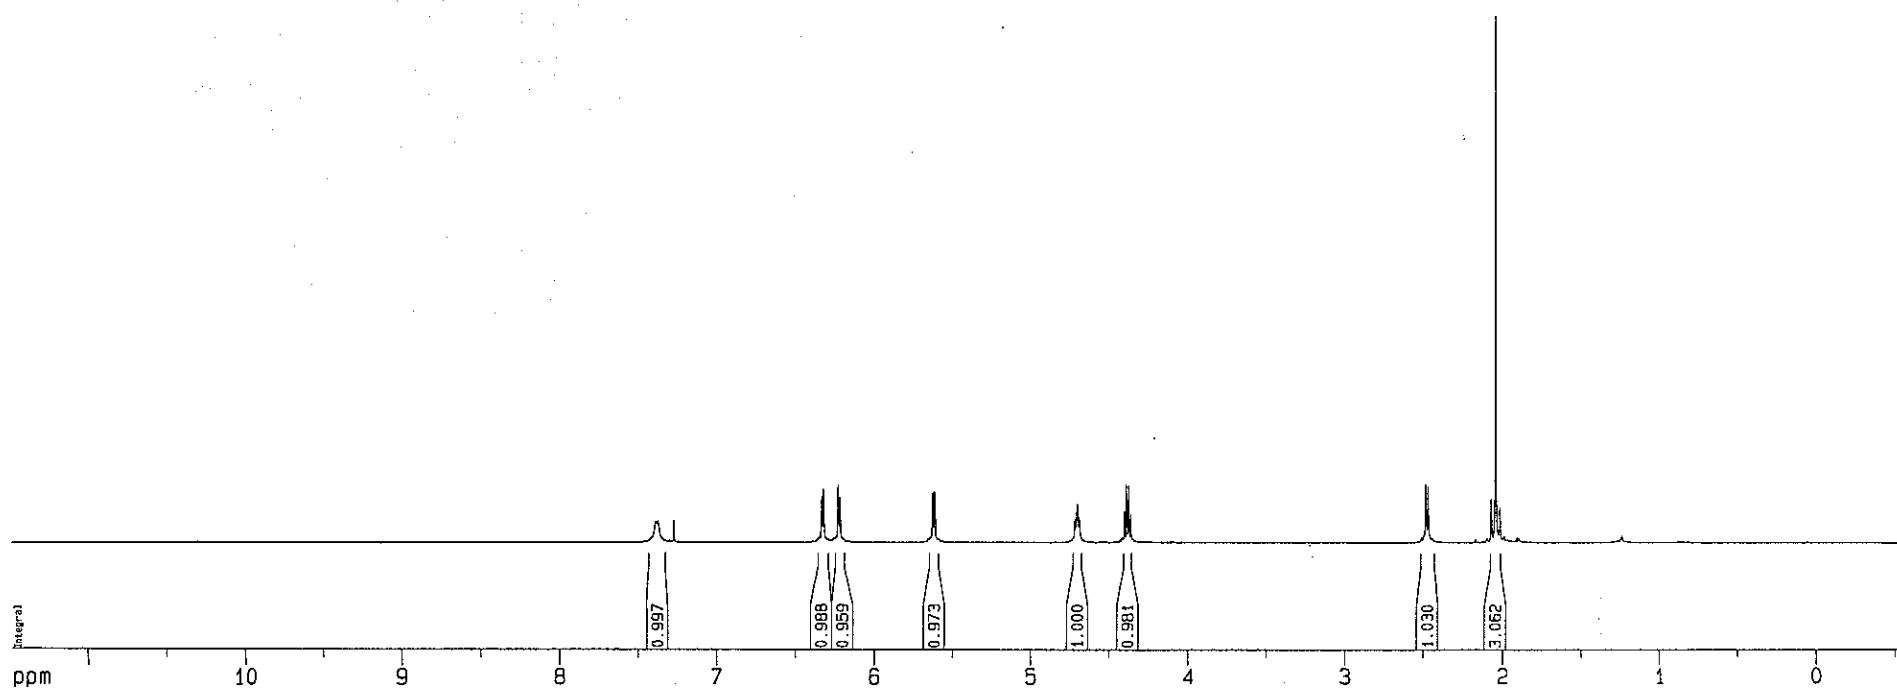

13

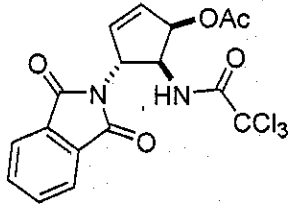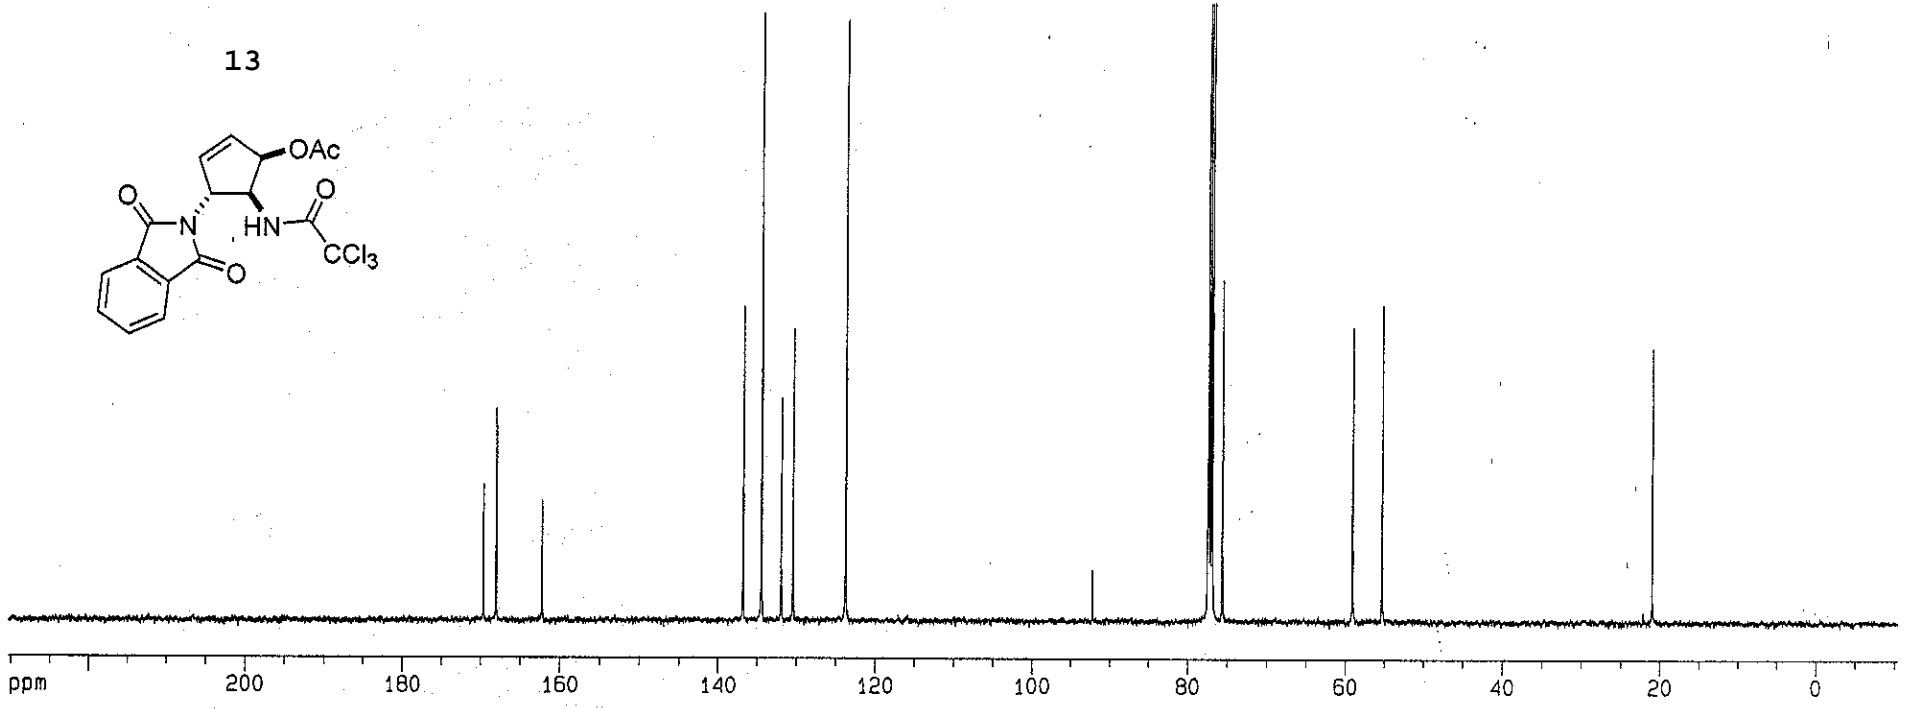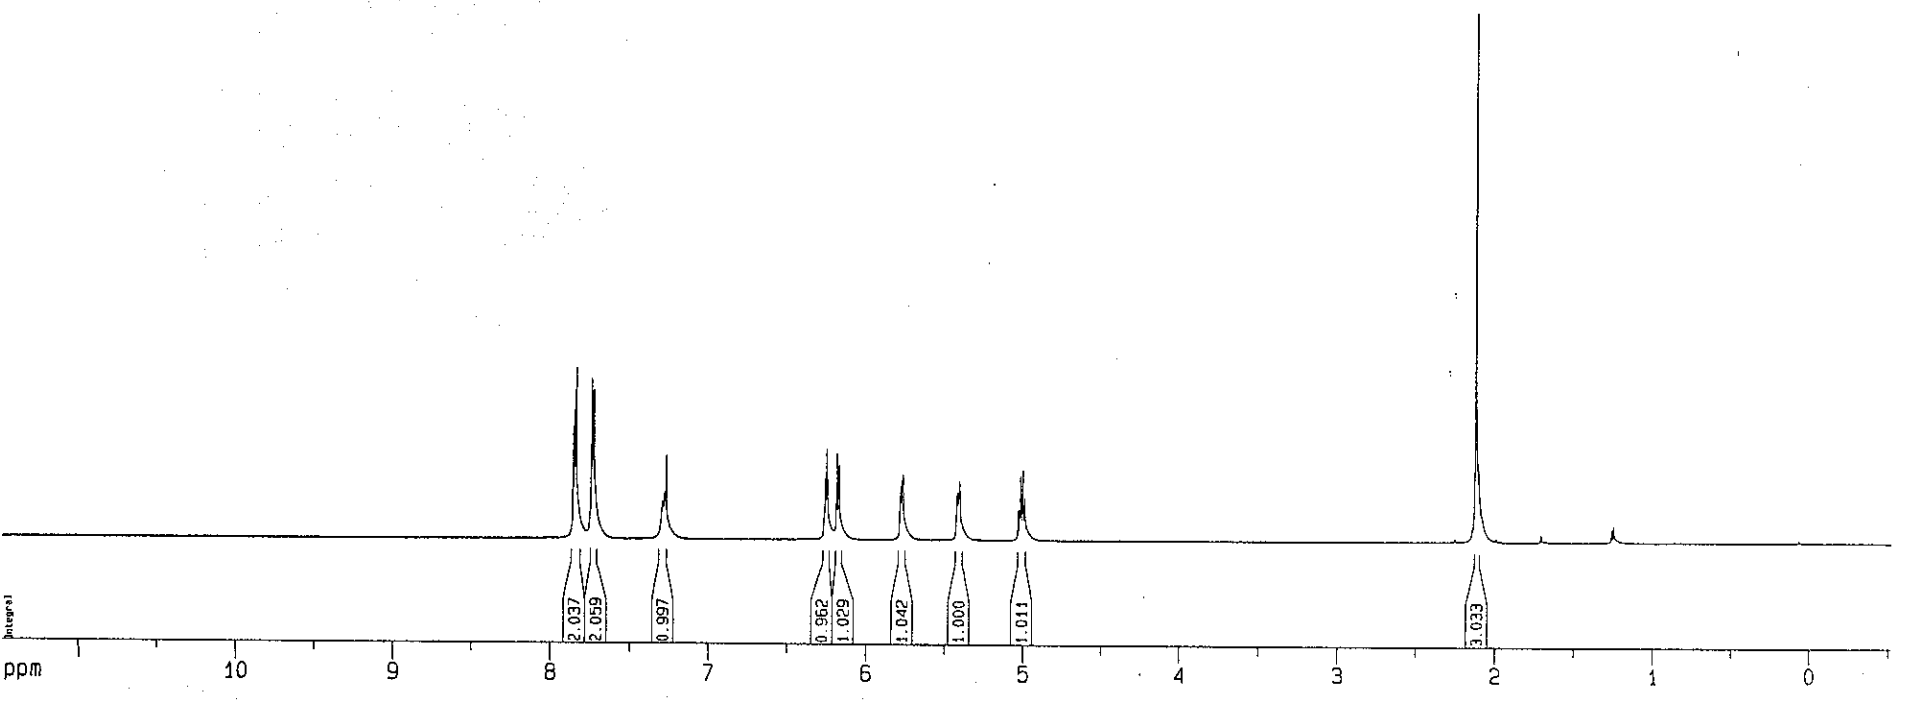

14, R = Bn

S2/8

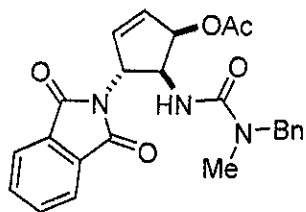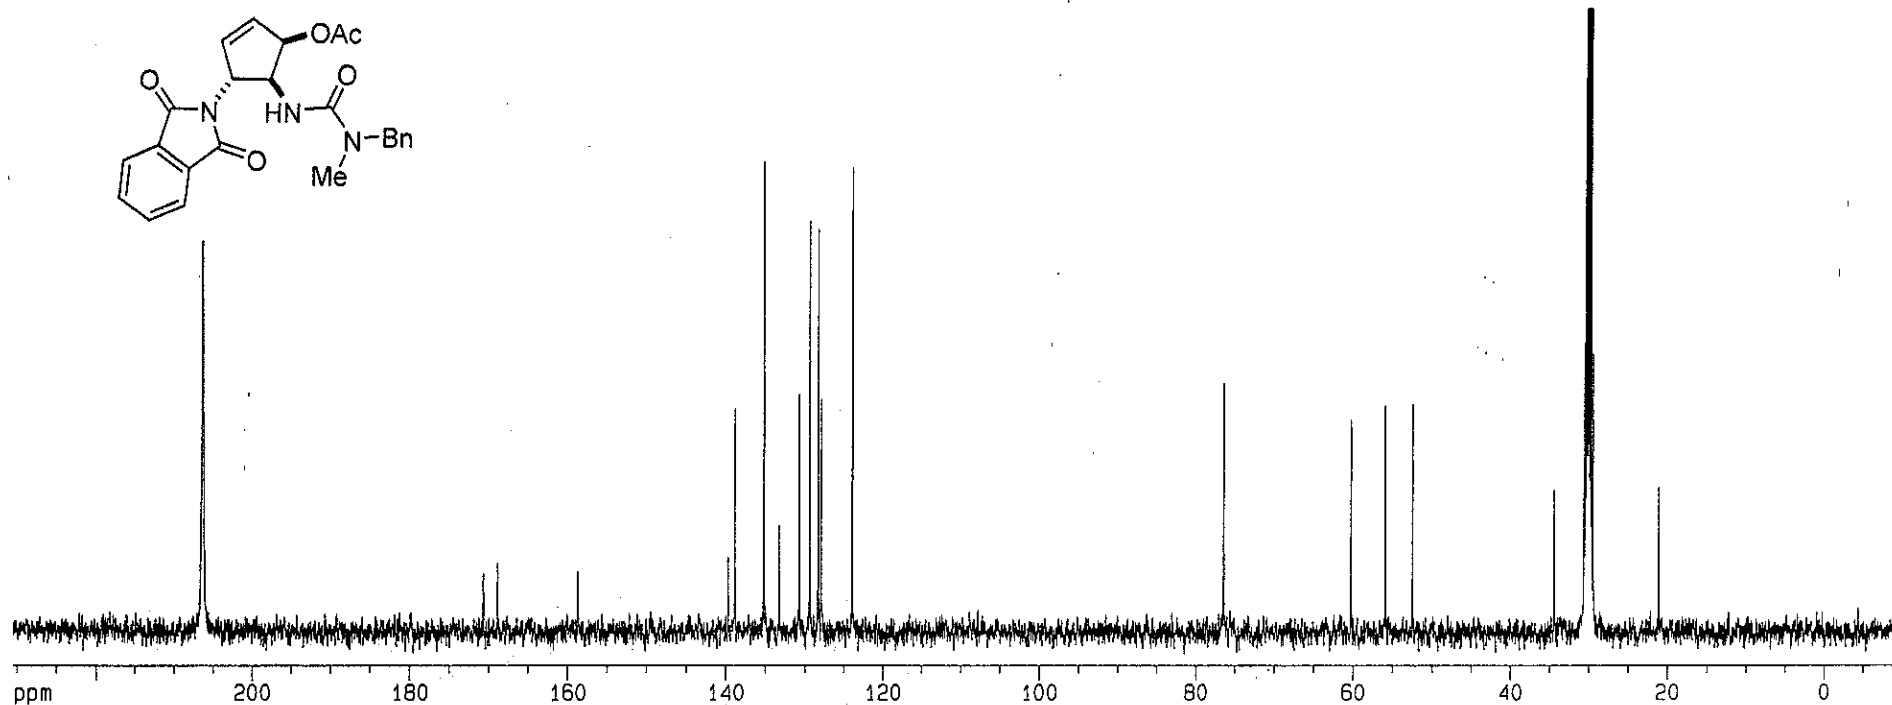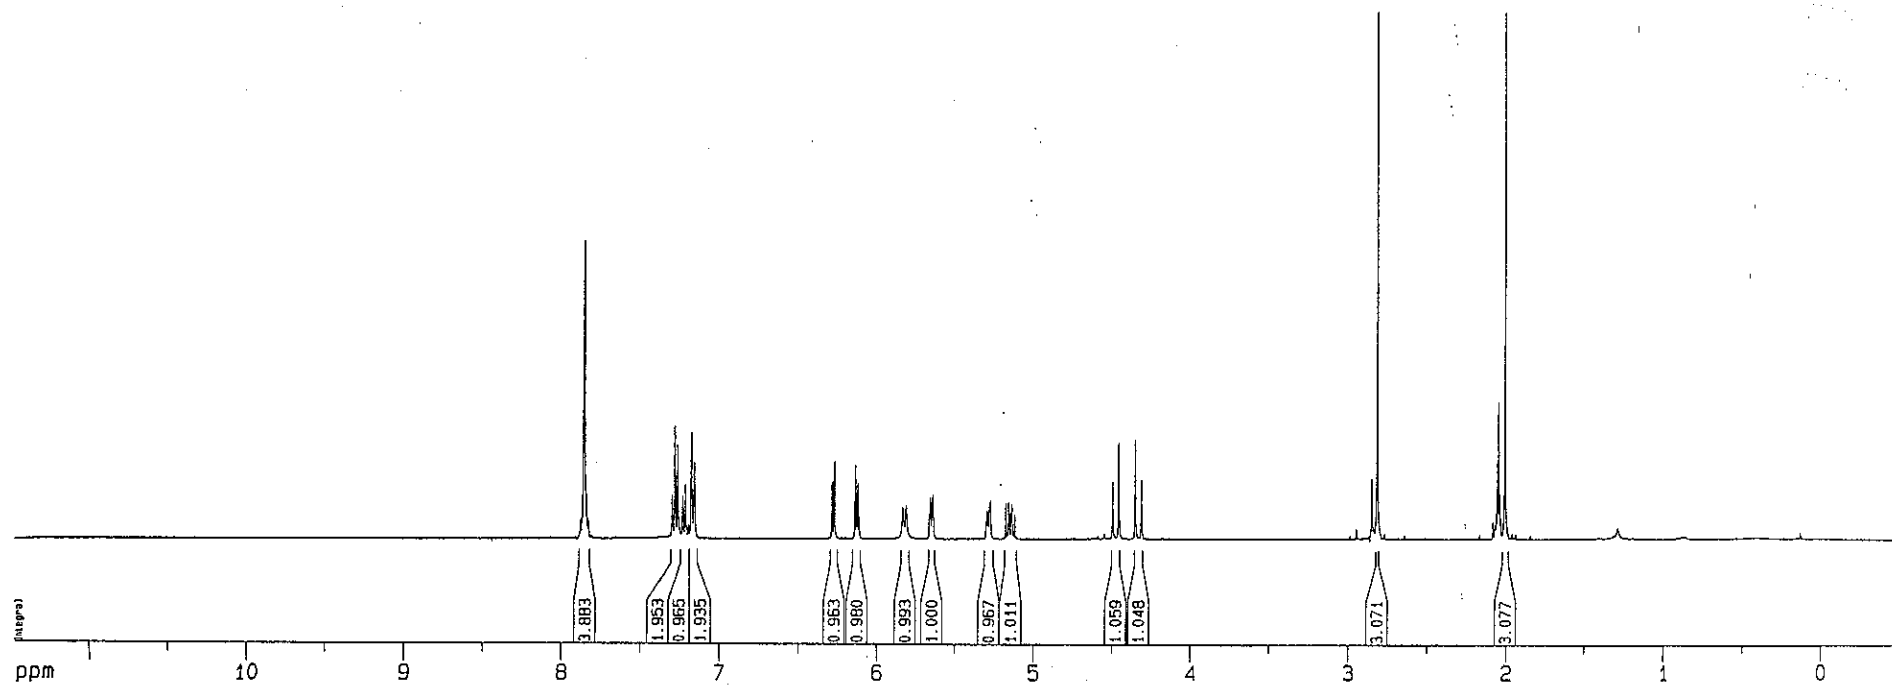



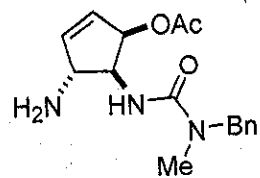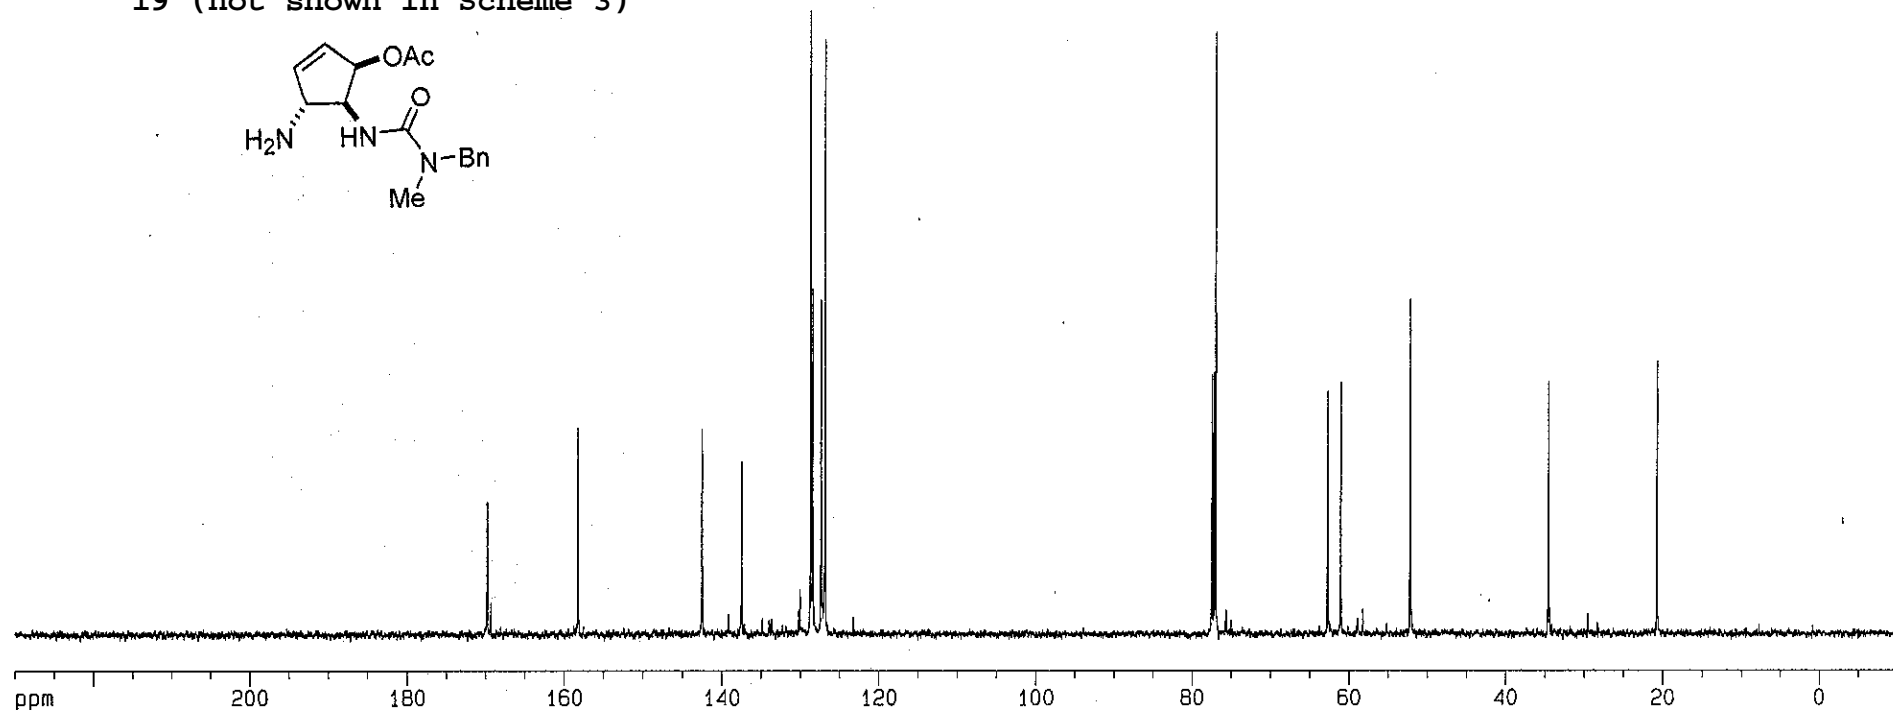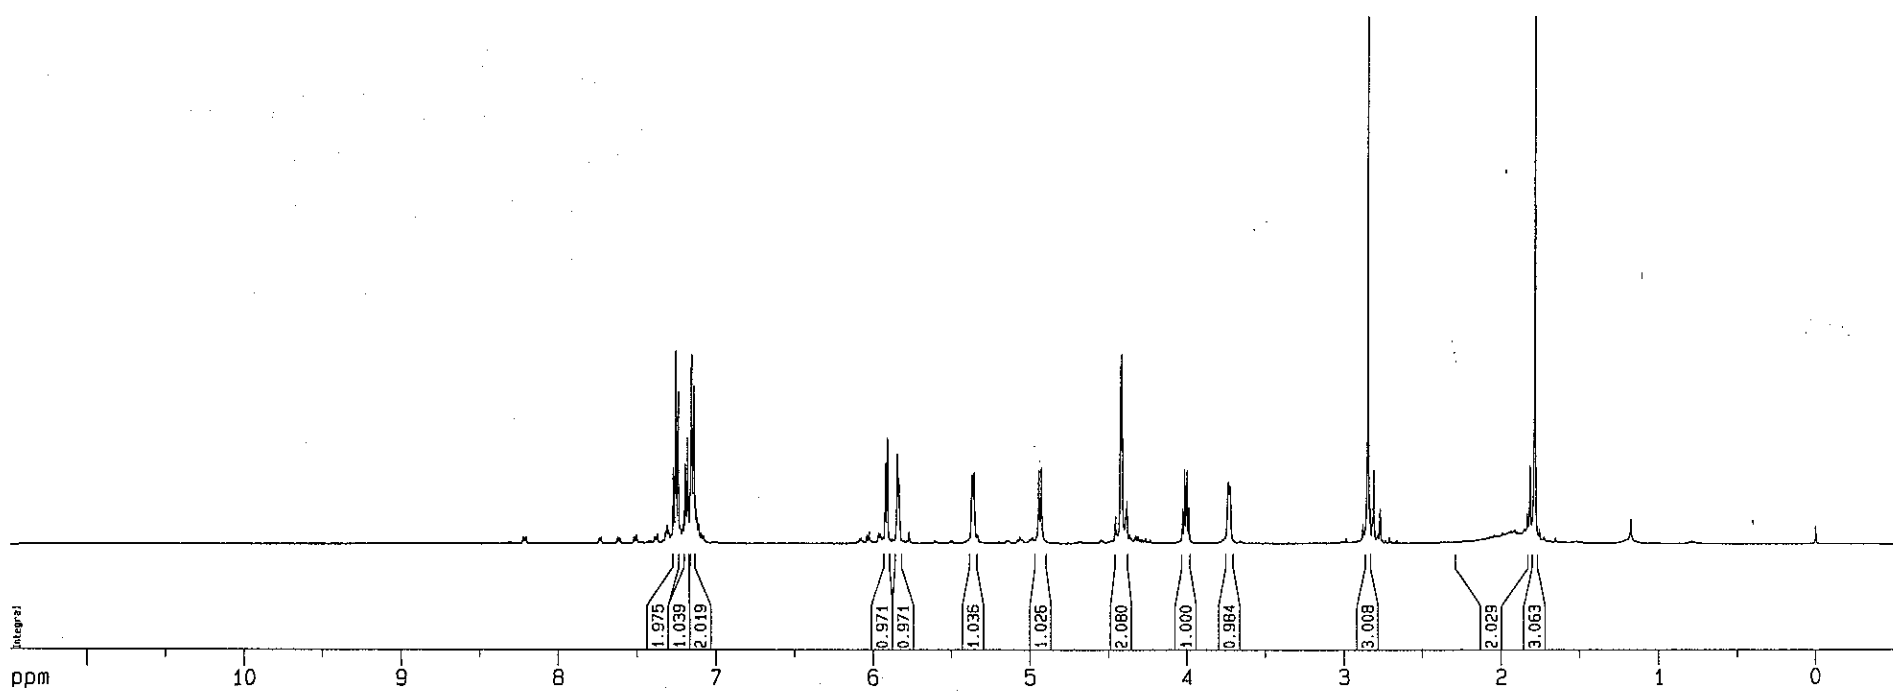

15

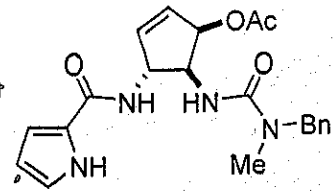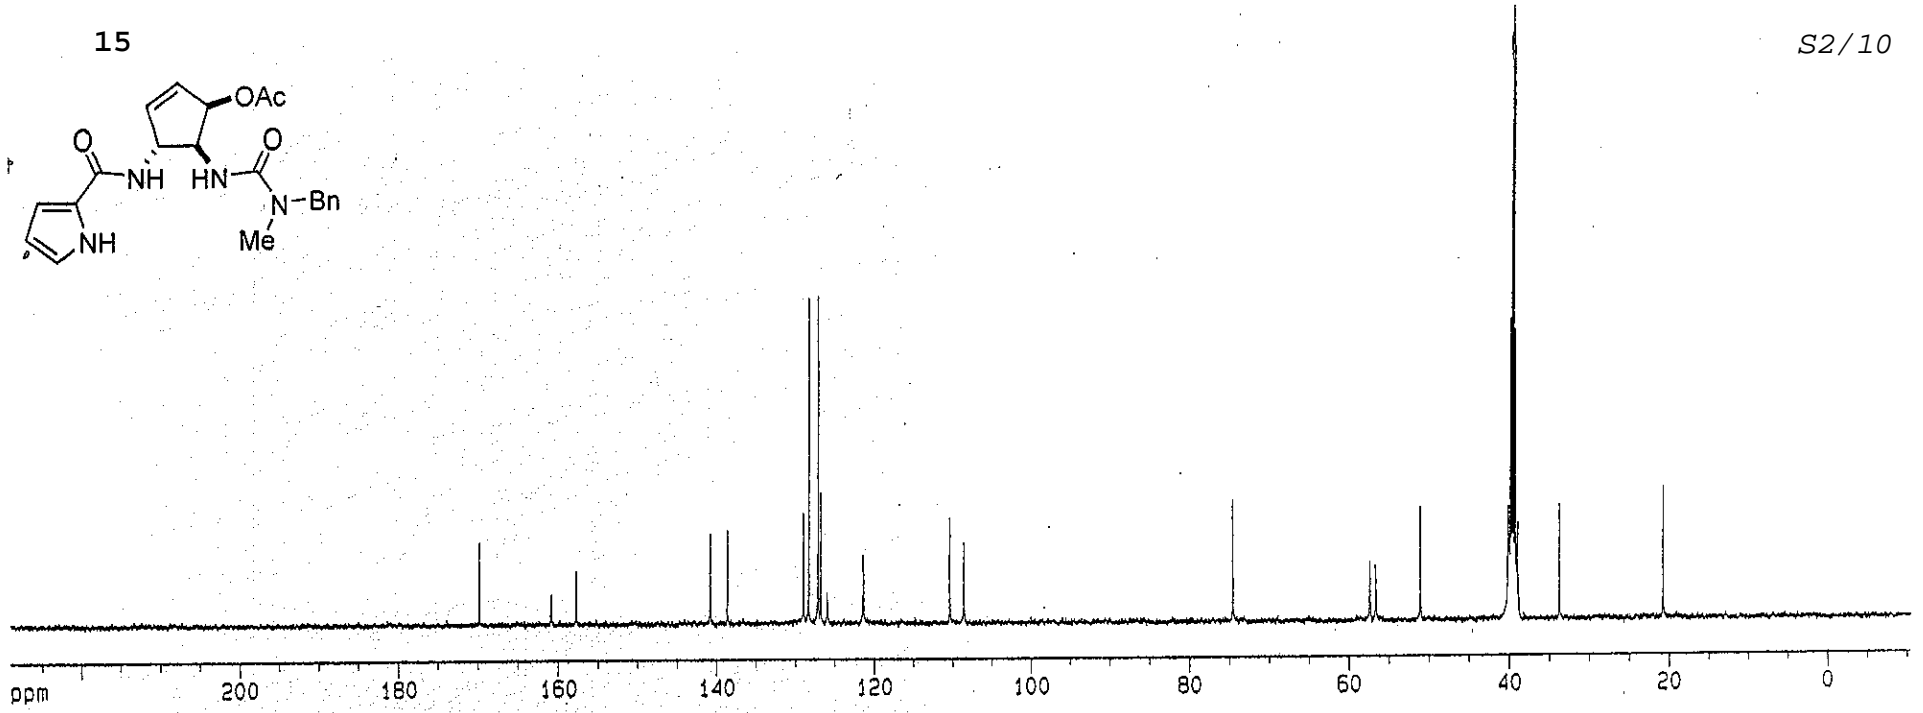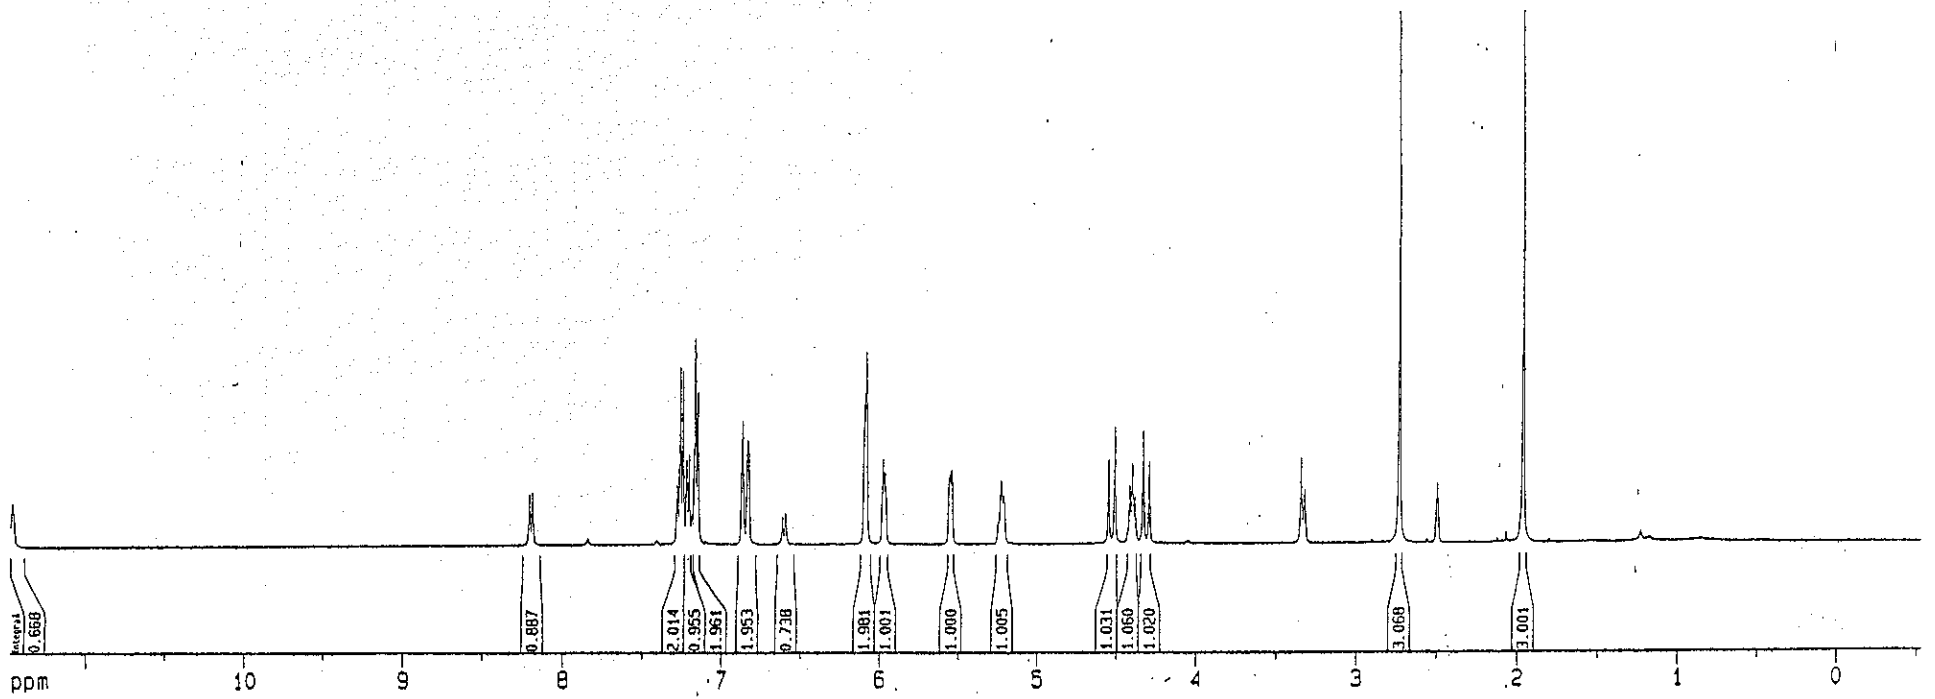

20 (not shown in Scheme 3)

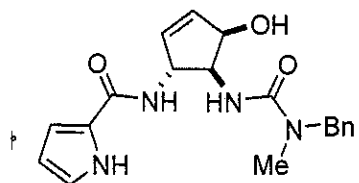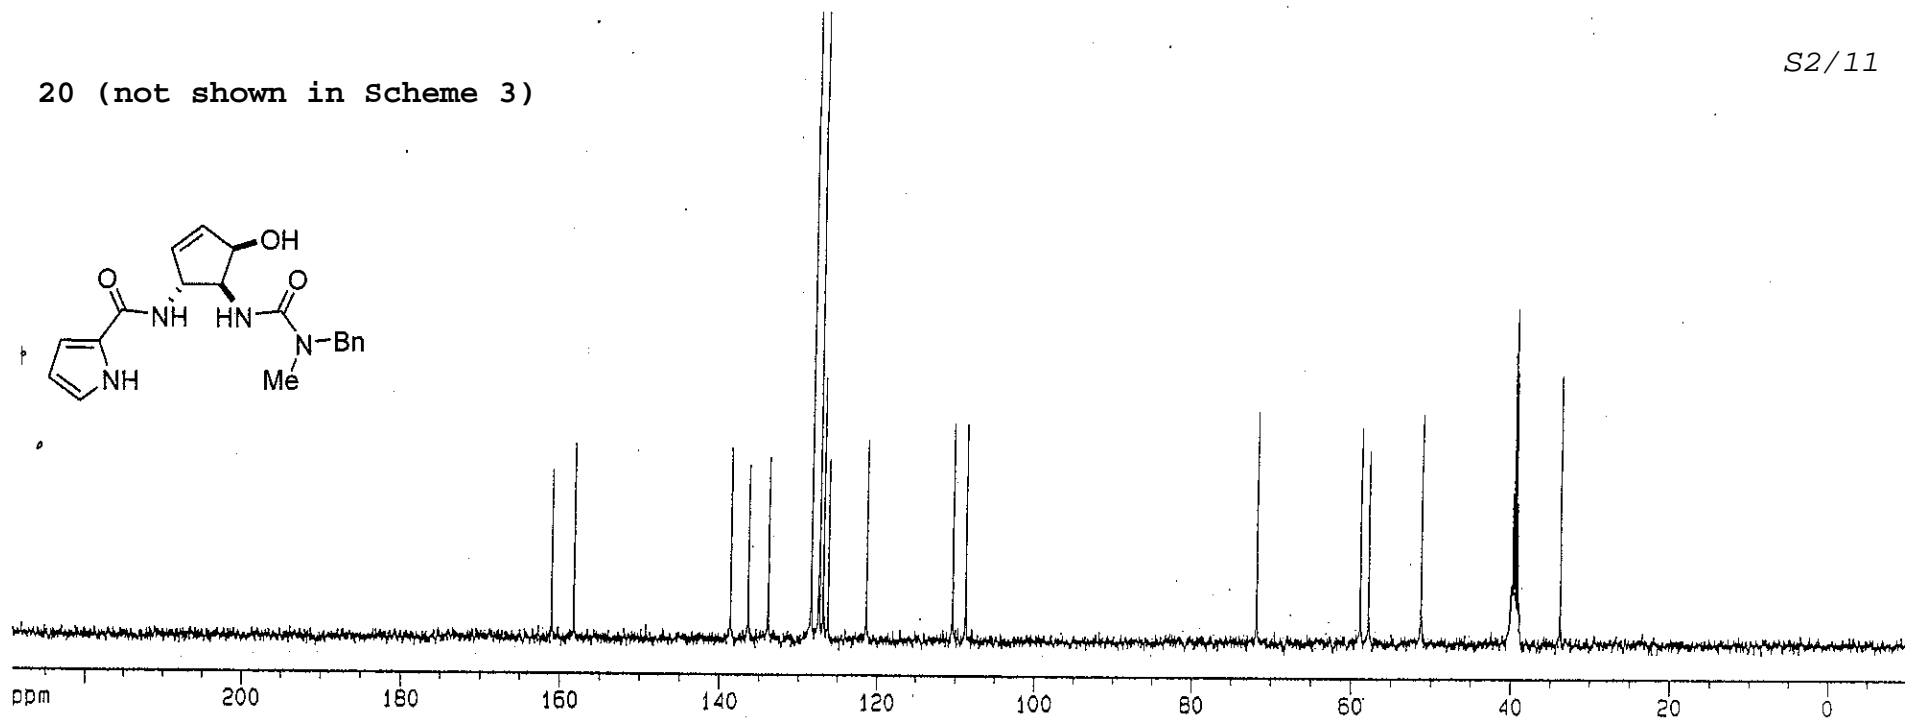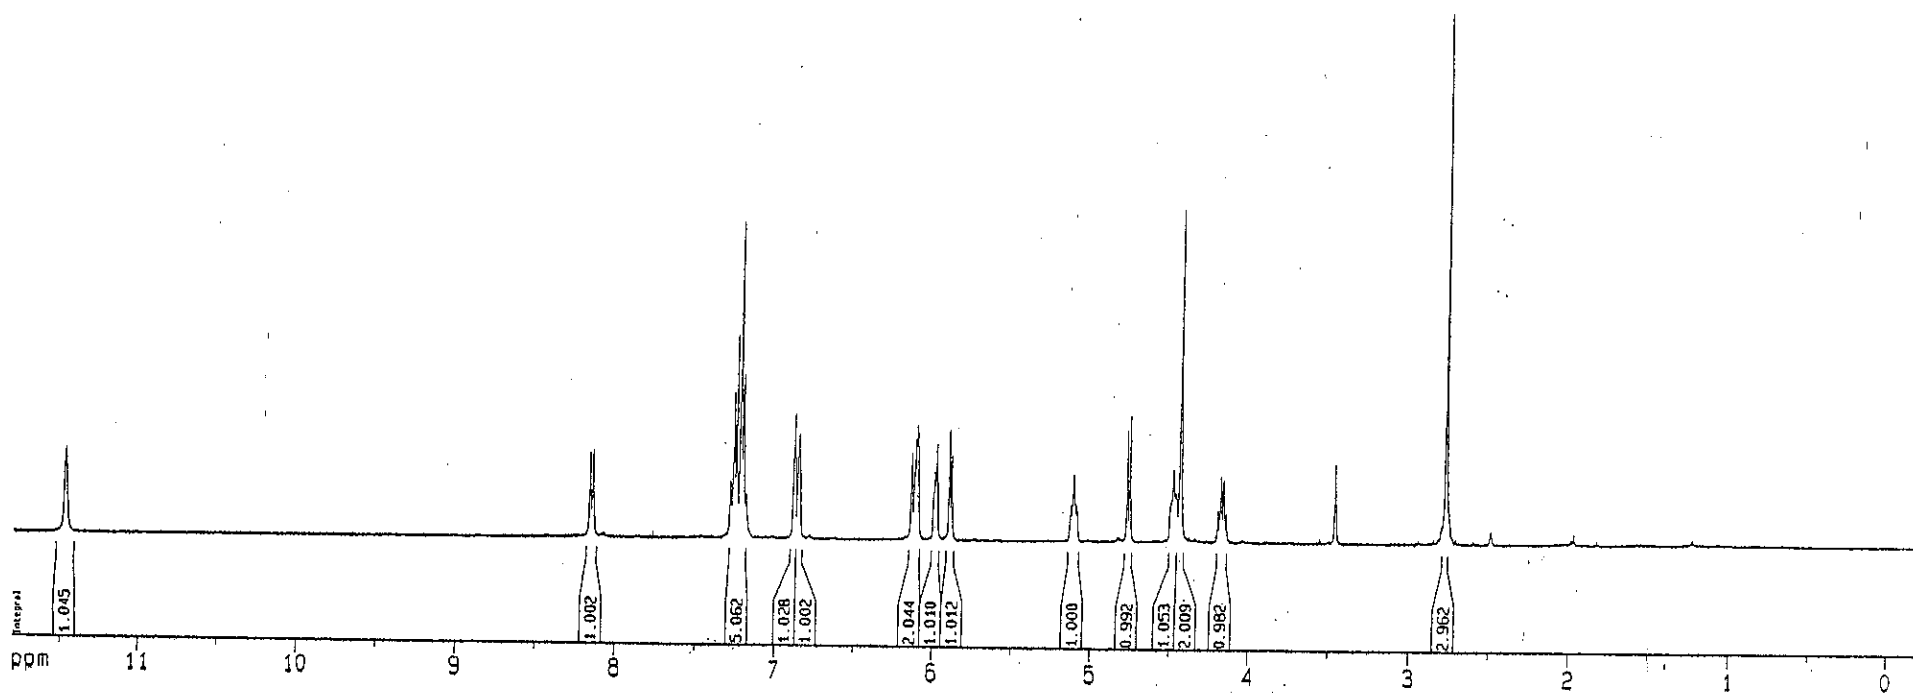

6

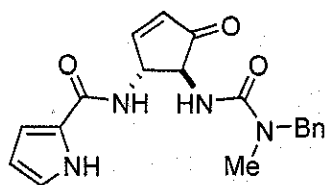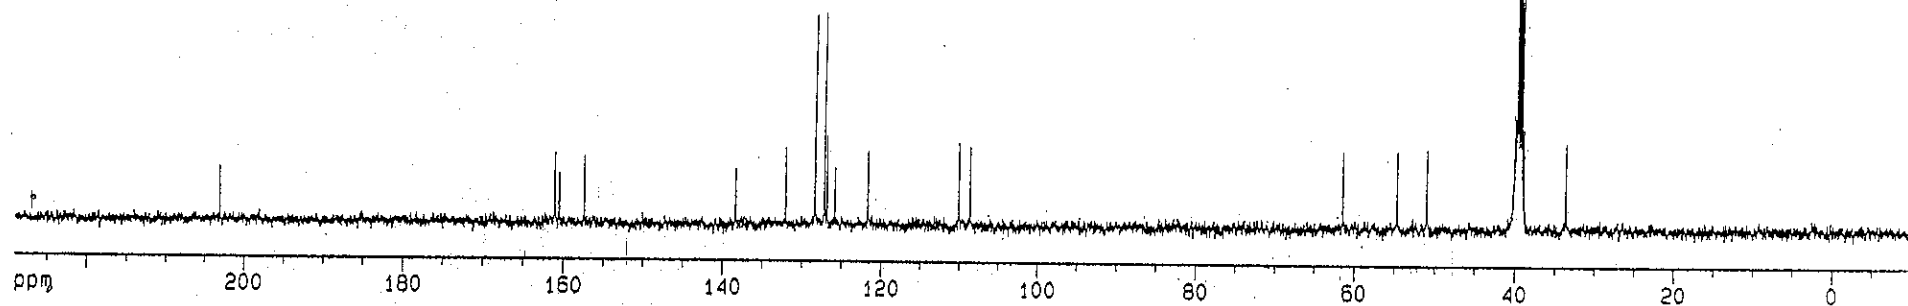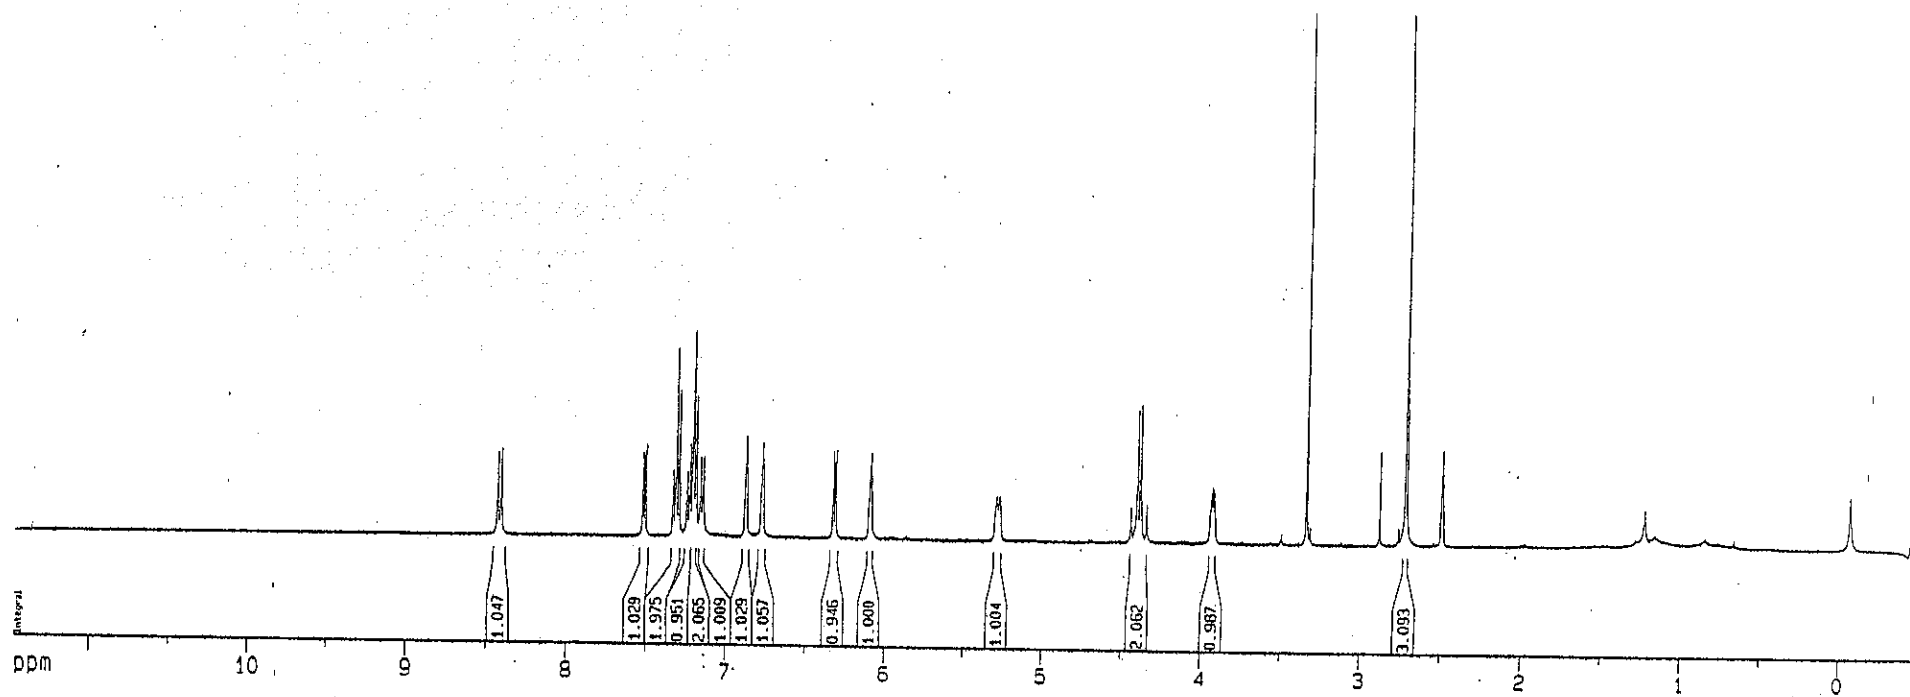

16

S2/13

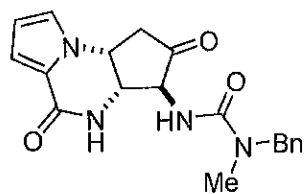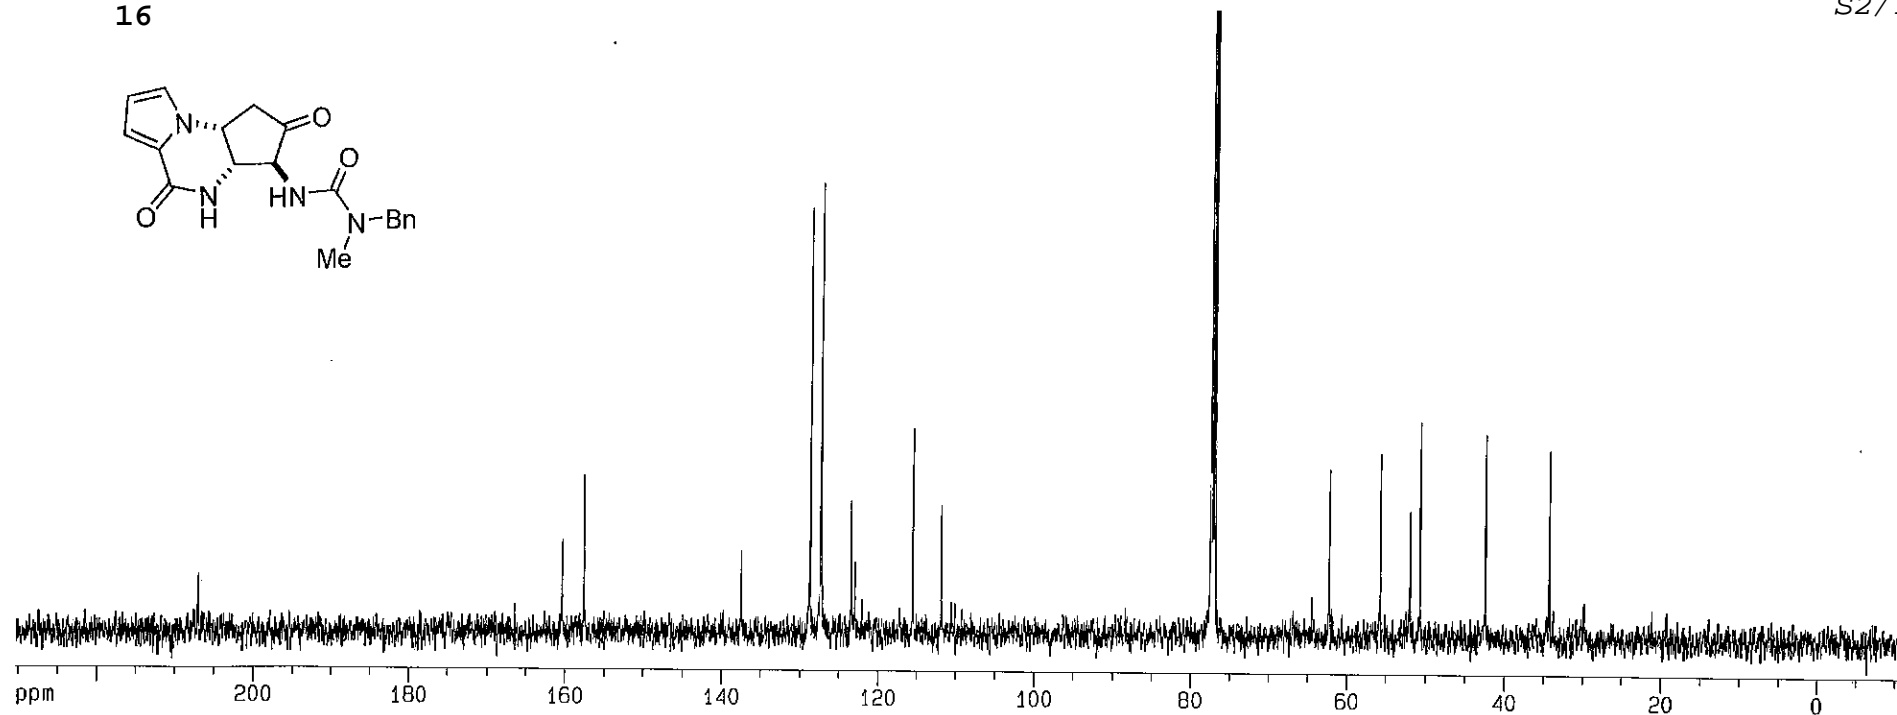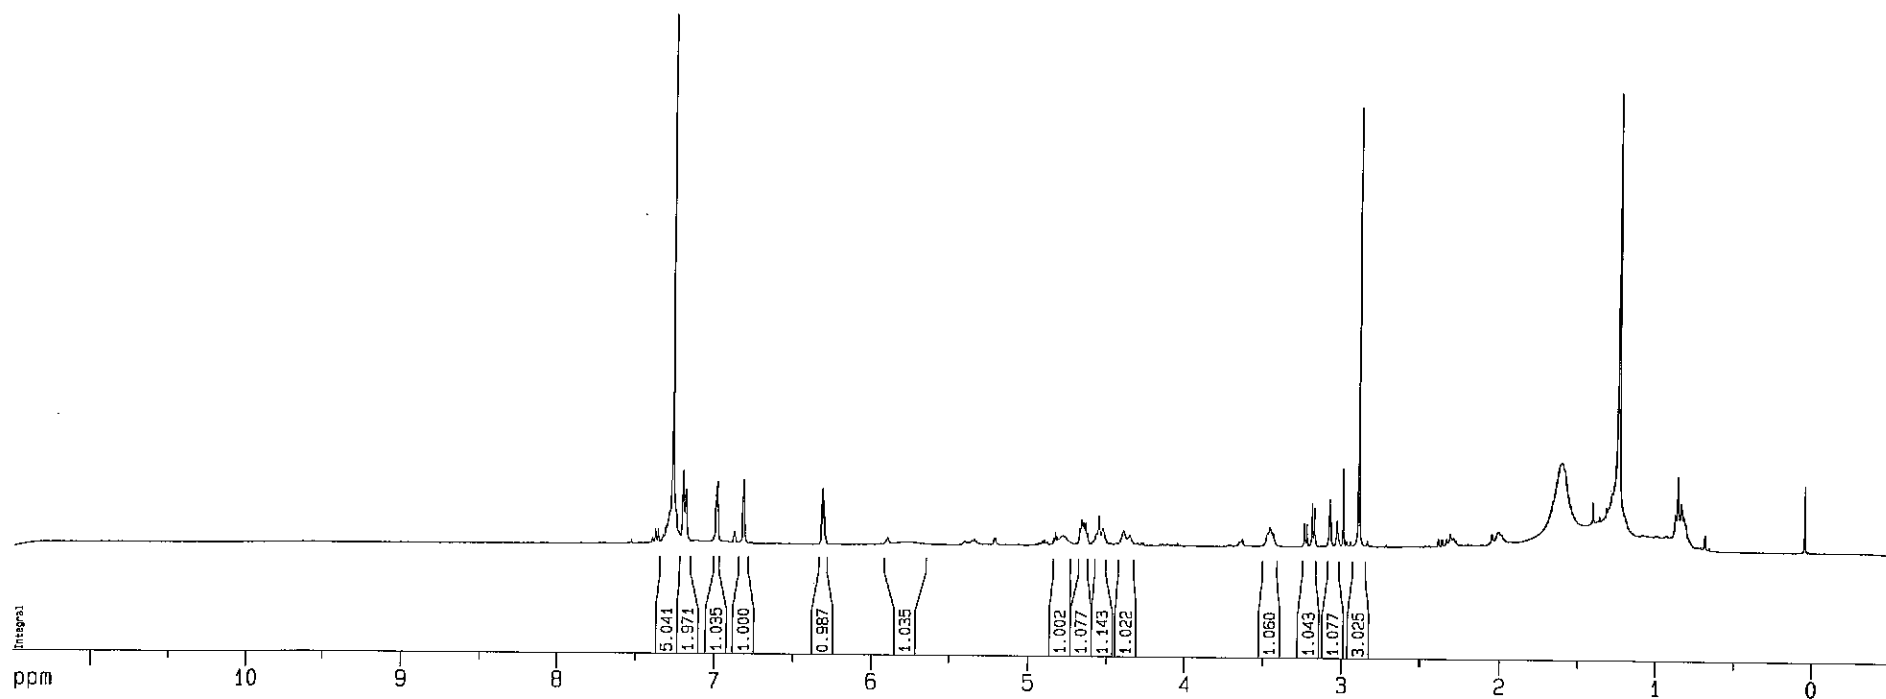

18

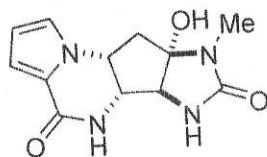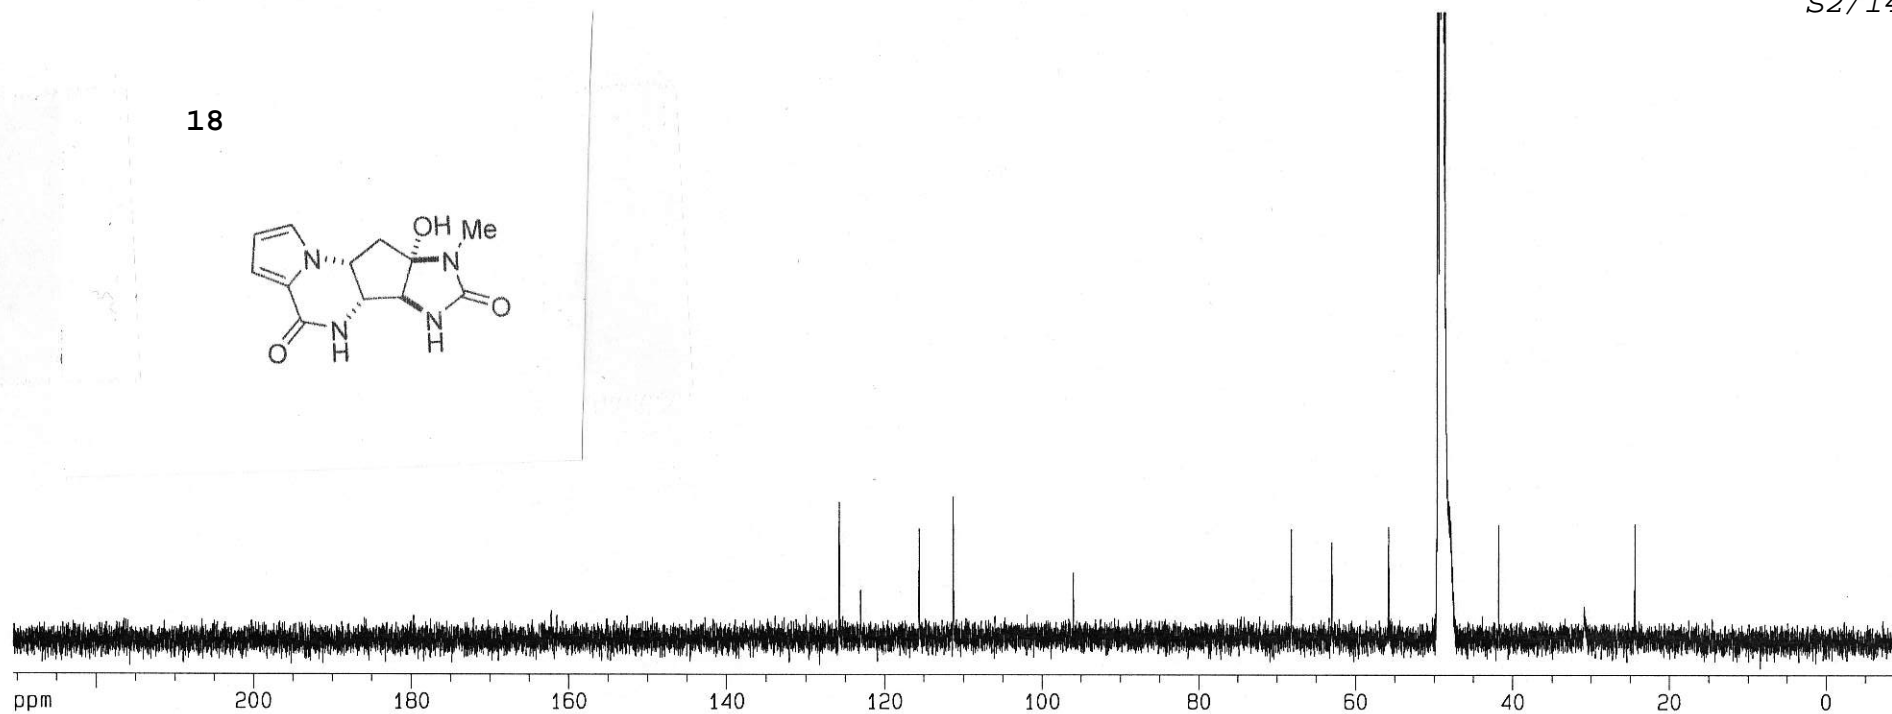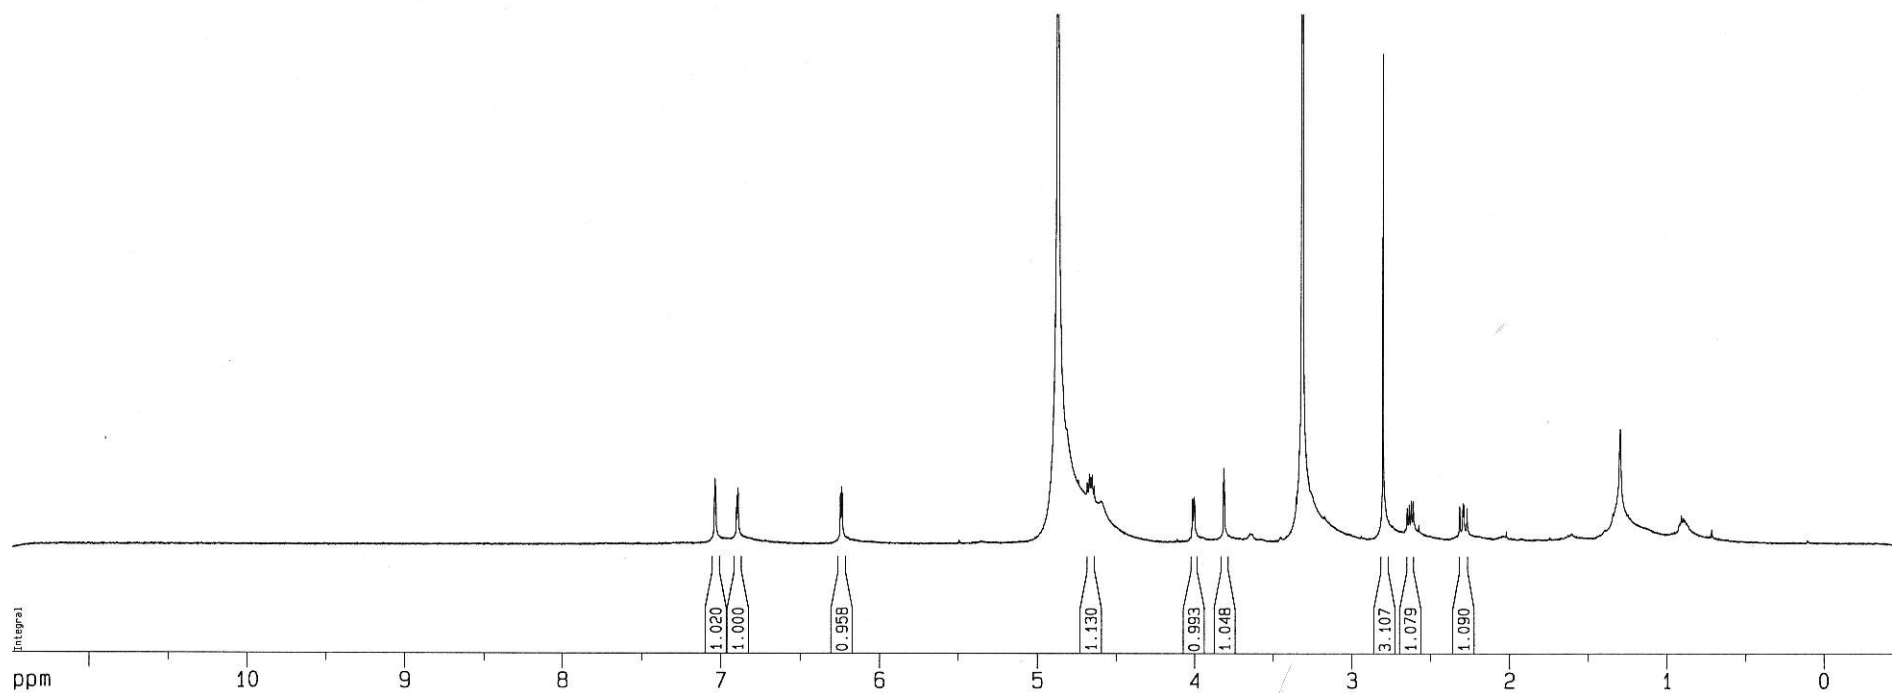

1

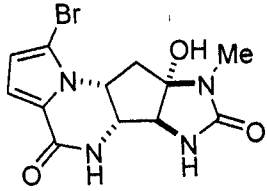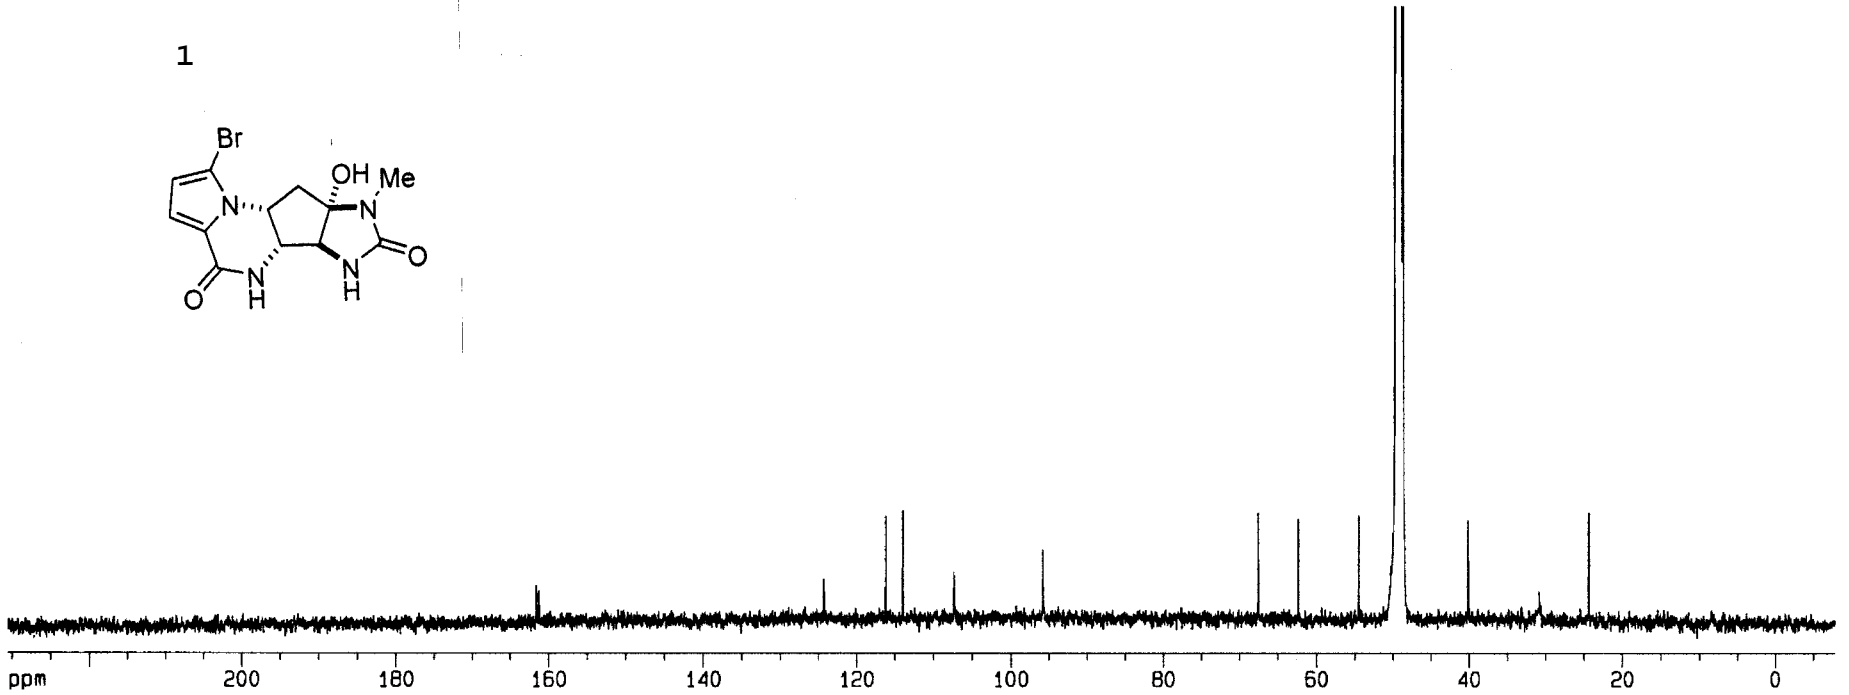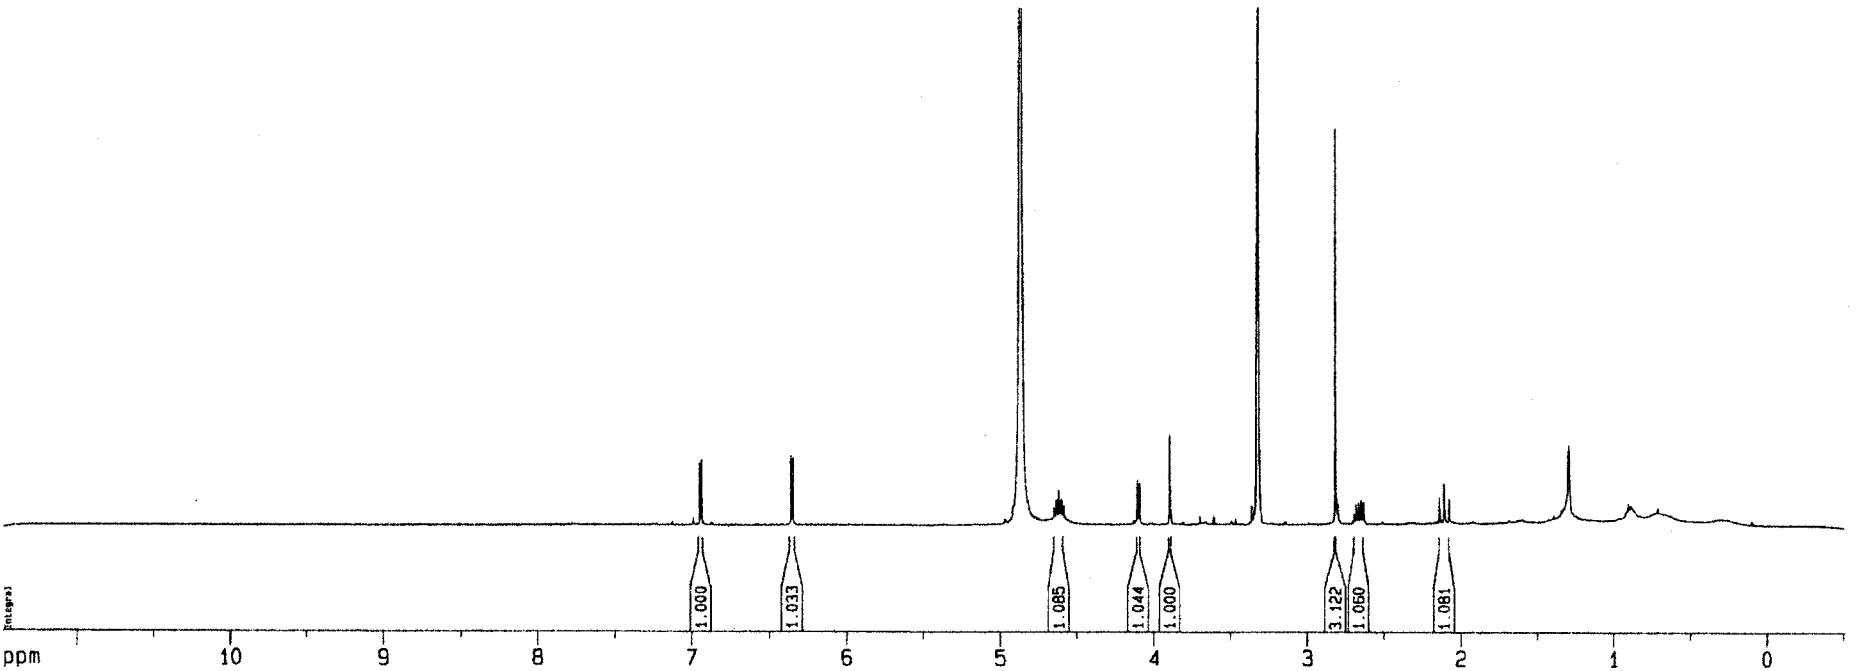

Supplement: NIHMS96947-supplement-2_si_002.pdf [file NIHMS96947-supplement-2_si_002.pdf]
